# Supplementary material for: Revisiting the catalytic mechanism of Mo–Cu carbon monoxide dehydrogenase using QM/MM and DFT calculations
Source: Royal Society of Chemistry journal article supplement (doi:10.1039/c8cp00858b), 2018-01-01
Supplement: c8cp00858b1.pdf [file c8cp00858b1.pdf]

*Electronic Supplementary Information*

**Revisiting the Catalytic Mechanism of Mo-Cu Carbon Monoxide Dehydrogenase Using  
QM/MM and DFT Calculations**

Kai Xu and Hajime Hirao\*

*Department of Biology and Chemistry, City University of Hong Kong, Tat Chee Avenue,  
Kowloon, Hong Kong, China*

**Contents**

1. QM/MM results
2. Summary of previously reported DFT studies
3. DFT results
4. NPA charges for CO<sub>2</sub> and *n*-butylisocyanate
5. Heterolytic bond dissociation energies (BDEs) of the Cu–O and Cu–N coordination bonds in **Int4A** and **Int3'**
6. XYZ coordinates of optimized geometries (QM atoms & DFT optimized geometries)

## 1. QM/MM results

**Table S1.** ONIOM energy data

|                           | E1 <sup>a</sup><br>[hartree] | E <sub>disp</sub> <sup>b</sup><br>[hartree] | ZPE <sup>b</sup><br>[hartree] | G <sub>corr</sub> <sup>b</sup><br>[hartree] | E2 <sup>c</sup><br>[hartree] | Δ(E2+E <sub>disp</sub> +ZPE)<br>[kcal/mol] | Δ(E2+E <sub>disp</sub> +G <sub>corr</sub> )<br>[kcal/mol] |
|---------------------------|------------------------------|---------------------------------------------|-------------------------------|---------------------------------------------|------------------------------|--------------------------------------------|-----------------------------------------------------------|
| <b>Int1A</b> <sup>d</sup> | -4242.434323                 | -0.232352                                   | 18.983989                     | 17.898412                                   | -5687.003849                 | 3.1                                        | 2.1                                                       |
| <b>Int1B</b>              | -4242.418828                 | -0.234356                                   | 18.985450                     | 17.900064                                   | -5686.979003                 | 18.3                                       | 17.5                                                      |
|                           |                              |                                             |                               |                                             |                              |                                            |                                                           |
| <b>Int1A</b>              | -4242.441216                 | -0.229973                                   | 18.988007                     | 17.903960                                   | -5687.015153                 | 0.0                                        | 0.0                                                       |
| <b>TS1A</b>               | -4242.434619                 | -0.231451                                   | 18.987348                     | 17.904278                                   | -5687.003642                 | 5.9                                        | 6.5                                                       |
| <b>Int2A</b>              | -4242.448097                 | -0.232935                                   | 18.989278                     | 17.907395                                   | -5687.013398                 | 0.0                                        | 1.4                                                       |
| <b>TS2A</b>               | -4242.440786                 | -0.231046                                   | 18.988905                     | 17.908478                                   | -5687.009393                 | 3.5                                        | 5.8                                                       |
| <b>Int3A</b>              | -4242.452768                 | -0.229705                                   | 18.991194                     | 17.910601                                   | -5687.022600                 | -2.5                                       | -0.3                                                      |
| <b>TS3A</b>               | -4242.448438                 | -0.228392                                   | 18.990187                     | 17.911563                                   | -5687.021309                 | -1.5                                       | 1.9                                                       |
| <b>Int4A</b>              | -4242.464099                 | -0.224995                                   | 18.991112                     | 17.909934                                   | -5687.036449                 | -8.3                                       | -6.5                                                      |
| <b>TS4A</b>               | -4242.434329                 | -0.230658                                   | 18.988758                     | 17.906299                                   | -5687.006575                 | 5.4                                        | 6.4                                                       |
| <b>Int5A</b>              | -4242.464432                 | -0.224734                                   | 18.990723                     | 17.905247                                   | -5687.048003                 | -15.6                                      | -16.5                                                     |
| <b>Int6A</b>              | -4242.486655                 | -0.236075                                   | 18.990798                     | 17.909650                                   | -5687.044636                 | -20.6                                      | -18.8                                                     |
|                           |                              |                                             |                               |                                             |                              |                                            |                                                           |
| <b>Int1'</b>              | -4303.446977                 | -0.263144                                   | 19.091715                     | 18.006792                                   | -5748.002612                 | 0.0                                        | 0.0                                                       |
| <b>TS1'</b>               | -4303.434936                 | -0.260442                                   | 19.089395                     | 18.001200                                   | -5747.996505                 | 4.1                                        | 2.0                                                       |
| <b>Int2'</b>              | -4303.459247                 | -0.259585                                   | 19.093526                     | 18.010206                                   | -5748.014555                 | -4.1                                       | -3.1                                                      |
| <b>TS2'</b>               | -4303.451429                 | -0.257097                                   | 19.090755                     | 18.006491                                   | -5748.012861                 | -3.2                                       | -2.8                                                      |
| <b>Int2'</b>              | -4303.503985                 | -0.255582                                   | 19.092560                     | 18.007463                                   | -5748.069815                 | -36.9                                      | -37.0                                                     |

<sup>a</sup> ONIOM(B3LYP/B1:MM)-ME energy.

<sup>b</sup> Obtained from ONIOM(B3LYP/B1:MM)-ME frequency calculations.

<sup>c</sup> ONIOM(B3LYP/B2:MM)-EE//ONIOM(B3LYP/B1:MM)-ME energy.

<sup>d</sup> **Int1A** in Figure 1.

**Table S2.** ONIOM energy data for **Int4A** and **TS4A** obtained after removing all the water molecules

|              | E1 <sup>a</sup><br>[hartree] | E <sub>disp</sub> <sup>b</sup><br>[hartree] | ZPE <sup>b</sup><br>[hartree] | G <sub>corr</sub> <sup>b</sup><br>[hartree] | E2 <sup>c</sup><br>[hartree] | Δ(E2+E <sub>disp</sub> +ZPE)<br>[kcal/mol] | Δ(E2+E <sub>disp</sub> +G <sub>corr</sub> )<br>[kcal/mol] |
|--------------|------------------------------|---------------------------------------------|-------------------------------|---------------------------------------------|------------------------------|--------------------------------------------|-----------------------------------------------------------|
| <b>Int4A</b> | -4143.896324                 | -0.22928746                                 | 17.691975                     | 16.669494                                   | -5588.382931                 | 0.0                                        | 0.0                                                       |
| <b>TS4A</b>  | -4143.934298                 | -0.22419654                                 | 17.697215                     | 16.680120                                   | -5588.420457                 | 17.1                                       | 13.7                                                      |

<sup>a</sup> ONIOM(B3LYP/B1:MM)-ME energy.

<sup>b</sup> Obtained from ONIOM(B3LYP/B1:MM)-ME frequency calculations.

<sup>c</sup> ONIOM(B3LYP/B2:MM)-EE//ONIOM(B3LYP/B1:MM)-ME energy.

## 2. Summary of previously reported DFT studies

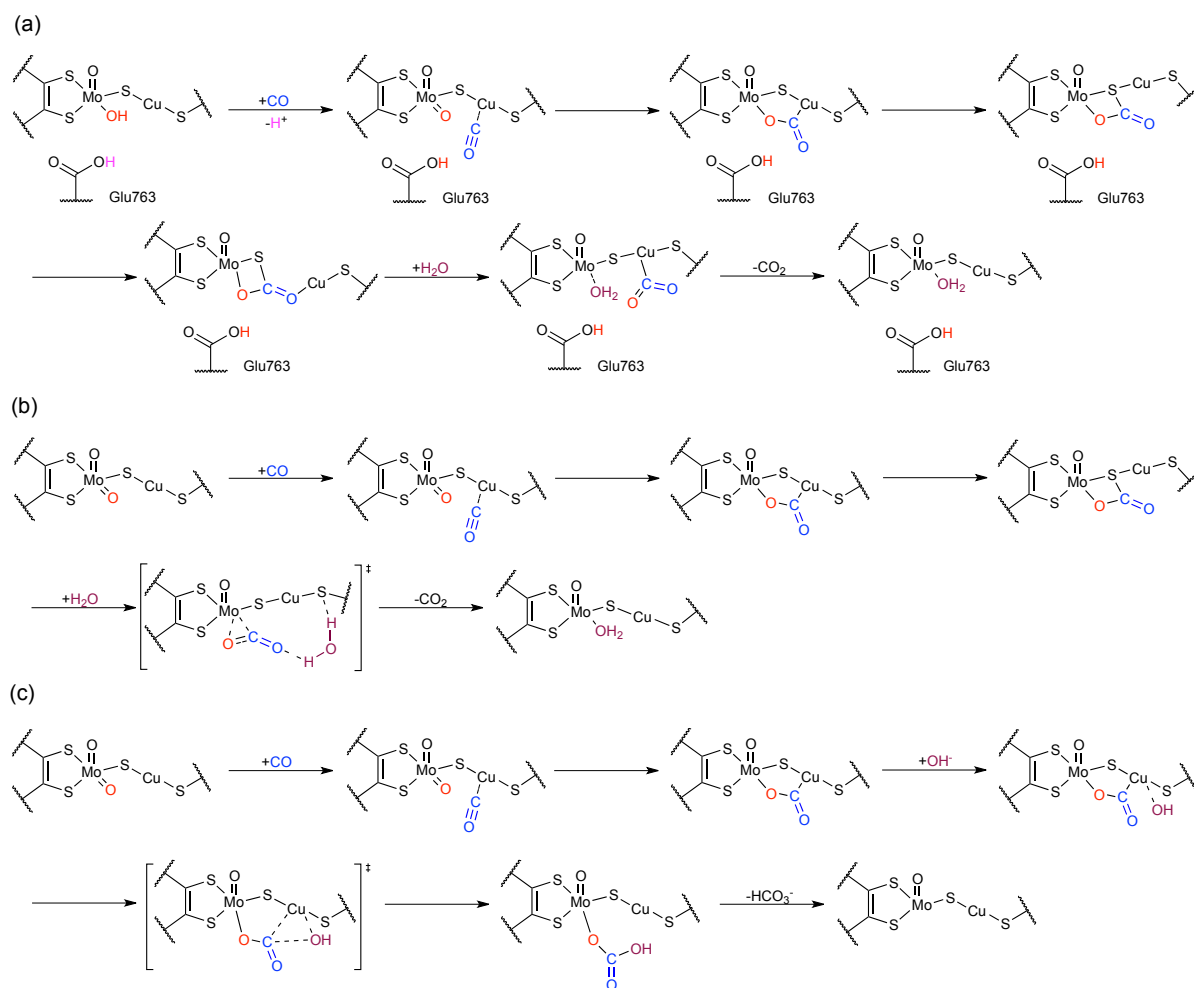

**Scheme S1.** Reaction mechanisms proposed based on DFT studies (a) by Siegbahn et al,(b) by Hofmann et al, and (c) by Stein et al.

Calculation methods:

- Siegbahn et al: B3LYP/LACV3P\*//B3LYP/LACVP
- Hofmann et al: B3LYP/SDD//B3LYP/LANL2DZ
- Stein et al: PBE/TZP

### 3. DFT Results

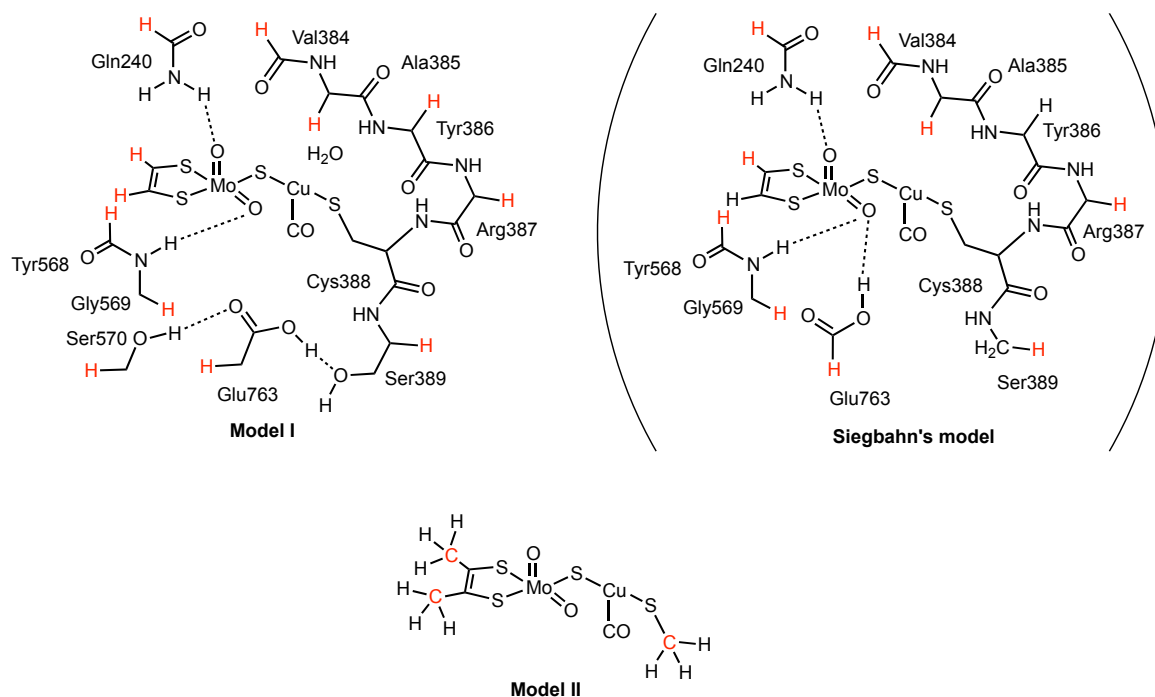

**Scheme S2.** Models I and II. Red-colored atoms are fixed ones (at the positions in the crystal structure) when geometric constraints are imposed. Model I is based on our QM/MM model, and Model II was used previously by Hofmann et al. Siegbahn's model is also shown for comparison.

#### Notes:

These active-site models were built based on the published crystal structure (PDB code 1N5W) of MoCu-CODH, and the hydrogen atoms were attached to saturate the dangling bonds. However, for models I, to avoid arbitrariness in the positions of fixed hydrogen atoms, such hydrogen atoms were placed according to how ONIOM places H-link atoms at QM-MM boundaries. Model I is slightly larger than Siegbahn's model. Model II was examined both with and without constraints.

**Table S3.** DFT energy data obtained using model I

|              | E1 <sup>a</sup><br>[hartree] | E <sub>disp</sub><br>[hartree] | ZPE <sup>b</sup><br>[hartree] | G <sub>corr</sub> <sup>b</sup><br>[hartree] | E2 <sup>c</sup><br>[hartree] | $\Delta(E2+E_{\text{disp}}+ZPE)$<br>[kcal/mol] | $\Delta(E2+E_{\text{disp}}+G_{\text{corr}})$<br>[kcal/mol] |
|--------------|------------------------------|--------------------------------|-------------------------------|---------------------------------------------|------------------------------|------------------------------------------------|------------------------------------------------------------|
| <b>Int1A</b> | -4194.670982                 | -0.220074                      | 0.554400                      | 0.453717                                    | -5639.285032                 | 0.0                                            | 0.0                                                        |
| <b>TS1A</b>  | -4194.659169                 | -0.221854                      | 0.554186                      | 0.456296                                    | -5639.268416                 | 9.2                                            | 10.9                                                       |
| <b>Int2A</b> | -4194.675727                 | -0.224990                      | 0.556445                      | 0.460127                                    | -5639.279034                 | 2.0                                            | 4.7                                                        |
| <b>TS2A</b>  | -4194.668750                 | -0.219755                      | 0.555739                      | 0.459081                                    | -5639.275697                 | 6.9                                            | 9.4                                                        |
| <b>Int3A</b> | -4194.689164                 | -0.217302                      | 0.557363                      | 0.460775                                    | -5639.297926                 | -4.5                                           | -1.9                                                       |
| <b>TS3A</b>  | -4194.684670                 | -0.217334                      | 0.556905                      | 0.461373                                    | -5639.291686                 | -0.9                                           | 2.3                                                        |
| <b>Int4A</b> | -4194.699097                 | -0.214680                      | 0.557980                      | 0.462042                                    | -5639.303606                 | -6.0                                           | -3.0                                                       |
| <b>TS4A</b>  | -4194.665978                 | -0.218402                      | 0.555758                      | 0.456287                                    | -5639.273625                 | 9.1                                            | 9.8                                                        |
| <b>Int5A</b> | -4194.678165                 | -0.210994                      | 0.555714                      | 0.453294                                    | -5639.290254                 | 3.2                                            | 2.2                                                        |
| <b>Int6A</b> | -4194.688588                 | -0.223104                      | 0.557439                      | 0.458359                                    | -5639.292422                 | -4.6                                           | -3.6                                                       |

<sup>a</sup> B3LYP/B1 energy.

<sup>b</sup> Obtained from B3LYP/B1 frequency calculations.

<sup>c</sup> B3LYP(SCRF)/B2//B3LYP/B1 energy.

**Table S4.** DFT energy data obtained using model II

| without any constraint | E1 <sup>a</sup><br>[hartree] | E <sub>disp</sub><br>[hartree] | ZPE <sup>b</sup><br>[hartree] | G <sub>corr</sub> <sup>b</sup><br>[hartree] | E2 <sup>c</sup><br>[hartree] | Δ(E2+E <sub>disp</sub> +ZPE)<br>[kcal/mol] | Δ(E2+E <sub>disp</sub> +G <sub>corr</sub> )<br>[kcal/mol] |
|------------------------|------------------------------|--------------------------------|-------------------------------|---------------------------------------------|------------------------------|--------------------------------------------|-----------------------------------------------------------|
| <b>Int1A</b>           | -2318.330800                 | -0.071605                      | 0.144823                      | 0.084923                                    | -3762.103487                 | 0.0                                        | 0.0                                                       |
| <b>TS1A</b>            | -2318.322234                 | -0.071683                      | 0.144622                      | 0.088745                                    | -3762.088418                 | 9.3                                        | 11.8                                                      |
| <b>Int2A</b>           | -2318.342204                 | -0.071905                      | 0.146953                      | 0.092111                                    | -3762.103303                 | 1.3                                        | 4.4                                                       |
| <b>TS2A</b>            | -2318.340929                 | -0.072165                      | 0.146634                      | 0.092943                                    | -3762.103270                 | 0.9                                        | 4.8                                                       |
| <b>Int3A</b>           | -2318.365943                 | -0.069807                      | 0.148218                      | 0.092915                                    | -3762.128660                 | -12.5                                      | -9.7                                                      |
| <b>TS3A</b>            | -2318.354867                 | -0.068513                      | 0.147619                      | 0.093687                                    | -3762.115501                 | -3.8                                       | -0.1                                                      |
| <b>Int4A</b>           | -2318.369712                 | -0.066315                      | 0.148502                      | 0.093041                                    | -3762.125471                 | -8.2                                       | -5.4                                                      |
| <b>TS4A</b>            | -2318.334945                 | -0.069205                      | 0.146323                      | 0.089223                                    | -3762.099885                 | 4.7                                        | 6.5                                                       |
| <b>Int5A</b>           | -2318.346811                 | -0.065790                      | 0.146747                      | 0.084515                                    | -3762.116237                 | -3.1                                       | -4.6                                                      |
| <b>Int7A</b>           | -2394.768289                 | -0.077597                      | 0.173174                      | 0.114982                                    | -3838.578018                 | -3.0                                       | 9.5                                                       |
| <b>Int8A</b>           | -2394.774265                 | -0.076562                      | 0.172302                      | 0.110644                                    | -3838.584759                 | -7.2                                       | 3.2                                                       |
|                        |                              |                                |                               |                                             |                              |                                            |                                                           |
| with constraints       |                              |                                |                               |                                             |                              |                                            |                                                           |
| <b>Int1A</b>           | -2318.327975                 | -0.071013                      | 0.135501                      | 0.075460                                    | -3762.101310                 | 0.0                                        | 0.0                                                       |
| <b>TS1A</b>            | -2318.321194                 | -0.071207                      | 0.135222                      | 0.078911                                    | -3762.087258                 | 8.5                                        | 10.9                                                      |
| <b>Int2A</b>           | -2318.341956                 | -0.071755                      | 0.137655                      | 0.082371                                    | -3762.103599                 | -0.6                                       | 2.4                                                       |
| <b>TS2A</b>            | -2318.335097                 | -0.071322                      | 0.137134                      | 0.082988                                    | -3762.097139                 | 3.4                                        | 7.1                                                       |
| <b>Int3A</b>           | -2318.364576                 | -0.069387                      | 0.138777                      | 0.082061                                    | -3762.127199                 | -13.2                                      | -11.1                                                     |
| <b>TS3A</b>            | -2318.352167                 | -0.068424                      | 0.138232                      | 0.083373                                    | -3762.112975                 | -4.0                                       | -0.7                                                      |
| <b>Int4A</b>           | -2318.367971                 | -0.066882                      | 0.139298                      | 0.084156                                    | -3762.124173                 | -9.4                                       | -6.3                                                      |
| <b>TS4A</b>            | -2318.333601                 | -0.068334                      | 0.136871                      | 0.078801                                    | -3762.098332                 | 4.4                                        | 5.6                                                       |
| <b>Int5A</b>           | -2318.345274                 | -0.064718                      | 0.137363                      | 0.075440                                    | -3762.114404                 | -3.1                                       | -4.3                                                      |
| <b>Int7A</b>           | -2394.766981                 | -0.077314                      | 0.163452                      | 0.103670                                    | -3838.577045                 | -4.2                                       | 7.4                                                       |
| <b>Int8A</b>           | -2394.771616                 | -0.073238                      | 0.162291                      | 0.098869                                    | -3838.583471                 | -6.4                                       | 2.9                                                       |
|                        |                              |                                |                               |                                             |                              |                                            |                                                           |
| <b>H<sub>2</sub>O</b>  | -76.407024                   | -0.000574                      | 0.021140                      | 0.002820                                    | -76.467903                   |                                            |                                                           |

<sup>a</sup> B3LYP/B1 energy.<sup>b</sup> Obtained from B3LYP/B1 frequency calculations.<sup>c</sup> B3LYP(SCRF)/B2//B3LYP/B1 energy.

#### 4. NPA charges for CO<sub>2</sub> and *n*-butylisocyanate

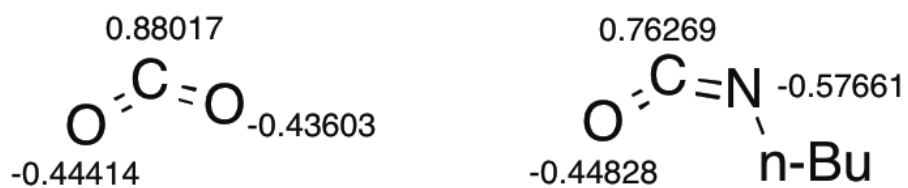

**Figure S1.** NPA charges (B3LYP/6-31G\*) for CO<sub>2</sub> and *n*-butylisocyanate. Geometries were taken from the QM/MM-optimized **Int4A** and **Int3'**.

## 5. Heterolytic bond dissociation energies (BDEs) of the Cu–O and Cu–N coordination bonds in **Int4A** and **Int3'**

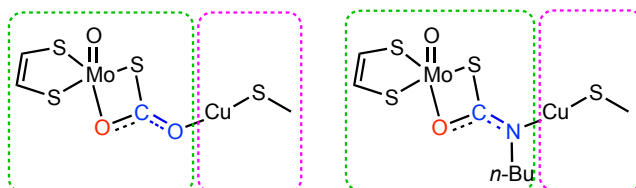

**Scheme S3.** Models used for calculating BDE.

**Table S5.** Heterolytic BDE

|      |                           | ZPE<br>(a.u.) | B3LYP-<br>D3/B2(SCRF)//B3LYP/<br>B1 (a.u.) | BDE<br>(kcal/mol) |
|------|---------------------------|---------------|--------------------------------------------|-------------------|
| Cu–O | <b>Int4A</b>              | 0.092753      | -3683.520503                               | 39.0              |
|      | [LMo(O)SCO] <sup>2-</sup> | 0.052531      | -1604.705007                               |                   |
|      | [Me–S–Cu] <sup>0</sup>    | 0.038911      | -2078.752054                               |                   |
| Cu–N | <b>Int3'</b>              | 0.218694      | -3820.956670                               | 53.6              |
|      | [LMo(O)SCN] <sup>2-</sup> | 0.177819      | -1742.117275                               |                   |
|      | [Me–S–Cu] <sup>0</sup>    | 0.038911      | -2078.752054                               |                   |

### Notes:

Initial geometries were taken from the QM/MM-optimized **Int4A** and **Int3'**. Geometry optimization and single-point energy calculations were performed using the same methods as used in our DFT calculations. All atoms were allowed to move during the geometry optimizations.



## 6. XYZ coordinates of optimized geometries

QM atoms in ONIOM-optimized geometries

====Int1A in Figure 1====

h 98.986243 151.169552 147.345846  
C 98.839681 150.132260 146.913017  
O 98.843471 149.948537 145.702226  
N 98.591548 149.181423 147.838641  
H 98.586761 148.185941 147.589415  
H 98.787862 149.331475 148.833239  
h 103.441305 140.653699 144.267307  
C 103.046659 141.599652 143.790517  
O 103.803978 142.482514 143.393917  
N 101.693650 141.587329 143.708213  
H 101.213223 140.833034 144.211948  
C 100.831410 142.600608 143.113264  
H 100.595266 143.387334 143.845427  
h 101.303801 143.098752 142.229048  
C 99.512553 141.956527 142.646755  
O 99.411528 140.773604 142.358297  
N 98.509388 142.861524 142.466391  
H 98.618747 143.769401 142.913188  
C 97.221544 142.640134 141.811417  
H 96.816362 143.650857 141.697510  
h 97.353610 142.207653 140.788574  
C 96.209015 141.815885 142.641651  
O 95.678001 140.802718 142.202213  
N 95.938565 142.340226 143.865096  
H 96.562881 143.044275 144.255916  
C 95.054398 141.695454 144.828164  
H 95.139486 142.289532 145.740898  
h 93.984553 141.716491 144.505632  
C 95.461503 140.243588 145.197221  
O 94.691349 139.294610 145.079940  
N 96.734786 140.127576 145.676267  
H 97.300509 140.966163 145.771950  
C 97.333297 138.842079 145.979042  
H 96.671985 138.104072 145.517705  
C 98.731628 138.697576 145.340105  
H 98.664713 139.027865 144.300741  
H 99.006316 137.641999 145.372108  
S 100.136489 139.555226 146.180641  
C 97.409636 138.412093 147.465543  
O 97.714444 137.239532 147.692389  
N 97.231209 139.373654 148.407197  
H 96.856288 140.273207 148.129697  
C 97.289121 139.204533 149.861842  
H 97.148739 140.204170 150.276654  
C 96.153863 138.342636 150.404649  
H 96.228393 137.331682 150.018049  
H 96.182425 138.323241 151.505063  
O 94.922625 138.935029 149.944655  
H 94.180800 138.553438 150.501940  
h 98.282749 138.881040 150.257444  
h 98.407371 145.691305 151.623889  
C 98.019952 144.792249 152.197514  
O 97.743101 144.877696 153.391921  
N 97.884430 143.697698 151.434940  
H 98.126463 143.742035 150.442536

C 97.421168 142.432146 151.958051  
H 97.381532 141.740450 151.119606  
H 98.131552 142.024818 152.686237  
h 96.413618 142.450444 152.424138  
h 93.610944 143.452088 152.873789  
C 92.823418 142.685771 152.690746  
H 93.171109 141.757273 153.155536  
H 91.908332 142.996507 153.209115  
O 92.497484 142.501547 151.327919  
H 93.303123 142.085690 150.952176  
h 92.815715 141.088375 148.042134  
C 93.289494 142.092275 148.161543  
H 93.288529 142.629052 147.215300  
H 92.754941 142.657684 148.922967  
C 94.679785 141.800364 148.632197  
O 95.639927 141.674596 147.906136  
O 94.687469 141.543553 149.965025  
h 93.513576 145.540917 148.999731  
C 94.394560 145.448697 148.352593  
S 95.868341 144.846717 149.077274  
C 94.398100 145.858752 147.061430  
S 95.794289 145.774380 146.018984  
h 93.519729 146.336057 146.713877  
O 102.877097 145.111230 147.676528  
H 102.758459 144.874931 146.726657  
H 102.268600 144.509322 148.130531  
Cu 99.577252 141.674153 146.789668  
S 98.461212 143.513158 145.734577  
Mo 97.735188 144.895664 147.458116  
O 98.515307 144.076344 148.806469  
O 98.539739 146.421266 147.347725  
C 100.384100 142.438724 148.353367  
O 101.215887 142.815270 149.049574  
H 95.091990 140.660650 150.176802

====Int1B====

h 99.089328 151.037228 147.320357  
C 99.043544 149.992456 146.884221  
O 99.188905 149.800735 145.683971  
N 98.742354 149.039173 147.791757  
H 98.779177 148.040318 147.572559  
H 98.813437 149.215637 148.799240  
h 103.398294 140.589535 144.036036  
C 103.009860 141.493276 143.476371  
O 103.773076 142.242540 142.872450  
N 101.658487 141.590493 143.562191  
H 101.192982 140.903168 144.167828  
C 100.778635 142.594790 142.973673  
H 100.559520 143.382702 143.709516  
h 101.224695 143.097870 142.080414  
C 99.448576 141.950426 142.532740  
O 99.347427 140.771963 142.231203  
N 98.435841 142.852455 142.392661  
H 98.565140 143.760024 142.834195  
C 97.141990 142.647917 141.743851  
H 96.739852 143.661574 141.654109

h 97.267765 142.234772 140.712693  
 C 96.130467 141.809375 142.564476  
 O 95.632739 140.776941 142.133430  
 N 95.826436 142.346903 143.776439  
 H 96.441264 143.060727 144.165042  
 C 94.963580 141.685400 144.749257  
 H 95.064147 142.277933 145.661017  
 h 93.888583 141.699966 144.450203  
 C 95.380900 140.232248 145.095322  
 O 94.625668 139.276775 144.953210  
 N 96.644870 140.128502 145.601936  
 H 97.221289 140.962713 145.660831  
 C 97.268897 138.843209 145.857001  
 H 96.625647 138.107934 145.368066  
 C 98.669082 138.763308 145.216959  
 H 98.597622 139.102535 144.181162  
 H 98.991219 137.721308 145.240890  
 S 100.028149 139.669861 146.079012  
 C 97.350411 138.382756 147.334173  
 O 97.735004 137.233482 147.546542  
 N 97.088287 139.330958 148.266248  
 H 96.649093 140.175561 147.937638  
 C 97.125307 139.236535 149.732564  
 H 96.930935 140.249874 150.081274  
 C 96.006590 138.367241 150.314634  
 H 96.266897 137.311120 150.249760  
 H 95.895540 138.624161 151.381261  
 O 94.799385 138.614283 149.590961  
 H 94.065261 138.367277 150.228151  
 h 98.127681 138.956867 150.154002  
 h 98.378609 145.669398 151.548420  
 C 98.023772 144.775282 152.146031  
 O 97.794425 144.879610 153.349213  
 N 97.887216 143.656459 151.416904  
 H 98.021983 143.665045 150.406645  
 C 97.462939 142.410024 152.025804  
 H 97.407690 141.654026 151.245905  
 H 98.204237 142.081721 152.759466  
 h 96.468930 142.458626 152.516124  
 h 93.649688 143.450994 152.853462  
 C 92.876735 142.682650 152.629957  
 H 93.180100 141.766318 153.146385  
 H 91.922501 143.011846 153.059214  
 O 92.680561 142.468333 151.245086  
 H 93.535566 142.083142 150.941732  
 h 93.023835 141.002258 148.135972  
 C 93.507925 142.003140 148.133376  
 H 93.532985 142.406911 147.124963  
 H 92.939014 142.674351 148.779570  
 C 94.869848 141.938725 148.754658  
 O 95.038628 141.782112 149.946345  
 O 95.896663 142.079693 147.903899  
 h 93.371323 145.850903 148.812992  
 C 94.284457 145.741910 148.214141  
 S 95.707824 145.110965 149.012571  
 C 94.343207 146.030593 146.896344  
 S 95.774828 145.764245 145.916946  
 h 93.496042 146.497763 146.466746  
 O 102.878117 145.342188 146.967820  
 H 103.099003 144.905726 146.115582

H 102.529215 144.622238 147.514965  
 Cu 99.540951 141.809299 146.614320  
 S 98.334505 143.646008 145.552562  
 Mo 97.575144 144.823523 147.404378  
 O 98.028317 143.622113 148.644852  
 O 98.588797 146.208760 147.576401  
 C 100.442164 142.713534 148.031007  
 O 101.229393 143.253523 148.668304  
 H 96.706319 142.338403 148.433872  
 =====

====Int1A====

h 98.923438 150.841282 147.261381  
 C 98.831031 150.090786 146.942410  
 O 98.817783 149.916084 145.729546  
 N 98.639136 149.126713 147.865088  
 H 98.612885 148.130877 147.619463  
 H 98.806061 149.286049 148.862977  
 h 103.298181 140.751418 144.007860  
 C 103.021838 141.428521 143.636404  
 O 103.794977 142.203135 143.079321  
 N 101.673553 141.527135 143.738250  
 H 101.220489 140.814836 144.322865  
 C 100.774783 142.574339 143.266869  
 H 100.460932 143.191796 144.120913  
 h 101.117011 143.077156 142.733922  
 C 99.504210 141.944587 142.656944  
 O 99.432374 140.773093 142.320802  
 N 98.491652 142.840094 142.473833  
 H 98.576904 143.739000 142.943650  
 C 97.206858 142.615274 141.812028  
 H 96.804486 143.626015 141.687150  
 h 97.301838 142.296113 141.074321  
 C 96.188043 141.802552 142.647539  
 O 95.654474 140.786919 142.216962  
 N 95.916918 142.339578 143.865650  
 H 96.544407 143.044075 144.250120  
 C 95.040730 141.702055 144.841566  
 H 95.132941 142.304095 145.748572  
 h 94.264847 141.715395 144.613011  
 C 95.451003 140.252244 145.217320  
 O 94.685847 139.300121 145.092444  
 N 96.720604 140.141479 145.706802  
 H 97.279848 140.982626 145.818225  
 C 97.324146 138.857062 146.004102  
 H 96.676544 138.118096 145.525656  
 C 98.733074 138.736197 145.384979  
 H 98.682075 139.081320 144.349095  
 H 99.018132 137.682842 145.403205  
 S 100.111263 139.592913 146.271087  
 C 97.388999 138.408268 147.486432  
 O 97.688881 137.231900 147.701459  
 N 97.211737 139.360510 148.437061  
 H 96.851571 140.267734 148.165768  
 C 97.273134 139.181674 149.890086  
 H 97.137991 140.178927 150.311829  
 C 96.134155 138.322763 150.428274  
 H 96.201985 137.313514 150.036769  
 H 96.160802 138.298411 151.528581  
 O 94.906626 138.923605 149.968478

H 94.161398 138.544208 150.523264  
h 97.992003 138.943198 150.173896  
h 98.272312 145.422844 151.803262  
C 97.991669 144.774097 152.221638  
O 97.715722 144.866513 153.415613  
N 97.856845 143.677335 151.462936  
H 98.098953 143.715659 150.469905  
C 97.388371 142.412852 151.983694  
H 97.330536 141.728936 151.140259  
H 98.102797 141.991785 152.699750  
h 96.662772 142.433266 152.327400  
h 93.366230 143.246859 152.842108  
C 92.791723 142.697396 152.708339  
H 93.119261 141.772322 153.193882  
H 91.872080 143.027669 153.206123  
O 92.488486 142.496366 151.342672  
H 93.299682 142.076621 150.982732  
h 92.943613 141.353741 148.100796  
C 93.285872 142.080525 148.189002  
H 93.283493 142.619443 147.243891  
H 92.751634 142.642999 148.952775  
C 94.676630 141.790363 148.658280  
O 95.636947 141.672577 147.931218  
O 94.687106 141.527815 149.990855  
h 93.711781 145.528205 148.818675  
C 94.353814 145.456984 148.357736  
S 95.809632 144.831925 149.100199  
C 94.379816 145.878285 147.070759  
S 95.787186 145.788452 146.045336  
h 93.750593 146.229717 146.811702  
O 105.924073 146.956632 145.650376  
H 105.533200 146.952289 144.741965  
H 105.264138 146.422262 146.127513  
Cu 99.628402 141.727789 146.855844  
S 98.393860 143.502487 145.759325  
Mo 97.689018 144.860581 147.502926  
O 98.449869 143.999756 148.834533  
O 98.534706 146.368899 147.429546  
C 100.599119 142.743160 148.164291  
O 101.430163 143.353435 148.663568  
H 95.069494 140.632174 150.195136  
=====

====TS1A====

h 98.965868 151.108804 147.372136  
C 98.842960 150.070914 146.931283  
O 98.811071 149.901457 145.717990  
N 98.683537 149.099360 147.852604  
H 98.668617 148.103435 147.610086  
H 98.846244 149.262158 148.850824  
h 103.343224 140.546375 144.251908  
C 102.977225 141.479906 143.729506  
O 103.767187 142.281559 143.237930  
N 101.624568 141.546379 143.725473  
H 101.136805 140.823288 144.267586  
C 100.772400 142.585350 143.164080  
H 100.524969 143.327226 143.937282  
h 101.256180 143.143492 142.324846  
C 99.458825 141.962708 142.657177  
O 99.336373 140.778605 142.385838

N 98.469223 142.878280 142.448869  
H 98.588614 143.800854 142.860516  
C 97.181075 142.643754 141.800726  
H 96.766649 143.650166 141.683564  
h 97.311970 142.206661 140.779544  
C 96.182913 141.814416 142.642340  
O 95.652444 140.797998 142.210941  
N 95.925190 142.334403 143.870794  
H 96.522013 143.068751 144.241310  
C 95.043380 141.696163 144.840224  
H 95.134262 142.292175 145.750997  
h 93.971716 141.720564 144.522051  
C 95.445291 140.242012 145.209760  
O 94.669781 139.297866 145.088534  
N 96.715897 140.116212 145.693907  
H 97.287914 140.949065 145.796269  
C 97.295134 138.824979 146.011633  
H 96.620285 138.092805 145.560342  
C 98.686475 138.642983 145.371384  
H 98.619919 138.947008 144.324201  
H 98.945081 137.585202 145.433219  
S 100.115649 139.504166 146.165275  
C 97.374191 138.405102 147.500723  
O 97.676309 137.231768 147.728121  
N 97.207441 139.368590 148.441075  
H 96.840115 140.272265 148.165933  
C 97.261108 139.192529 149.895719  
H 97.119232 140.189250 150.316120  
C 96.123997 138.326755 150.426386  
H 96.204393 137.315977 150.040851  
H 96.140573 138.308727 151.526906  
O 94.895728 138.915306 149.951418  
H 94.150951 138.542485 150.511512  
h 98.252468 138.865441 150.292823  
h 98.402278 145.684495 151.608767  
C 98.020808 144.786139 152.186701  
O 97.736607 144.879352 153.379322  
N 97.896318 143.686234 151.431868  
H 98.162695 143.705614 150.443914  
C 97.438235 142.422473 151.964314  
H 97.408165 141.724883 151.130601  
H 98.148320 142.025594 152.698534  
h 96.428131 142.438002 152.426642  
h 93.622766 143.437726 152.874446  
C 92.835482 142.671160 152.692738  
H 93.185168 141.743231 153.156748  
H 91.920760 142.980990 153.212421  
O 92.508264 142.485812 151.330551  
H 93.314441 142.070015 150.955277  
h 92.804647 141.085773 148.058984  
C 93.280976 142.088406 148.178844  
H 93.275014 142.628371 147.234358  
H 92.752565 142.651505 148.946147  
C 94.673622 141.789669 148.638334  
O 95.626067 141.662455 147.902380  
O 94.692016 141.524397 149.969066  
h 93.570084 145.526358 149.009876  
C 94.456543 145.429137 148.371129  
S 95.915030 144.787078 149.102663  
C 94.470062 145.837709 147.081754

S 95.856928 145.683534 146.025008  
h 93.600401 146.326079 146.727791  
O 105.935931 146.960100 145.642131  
H 105.547250 146.959829 144.732853  
H 105.287974 146.401390 146.108039  
Cu 99.587571 141.559067 146.882226  
S 98.532181 143.517875 145.762740  
Mo 97.753548 144.810209 147.454413  
O 98.557986 143.789663 148.763329  
O 98.615223 146.304019 147.482924  
C 99.997672 142.728771 148.398058  
O 100.914949 142.972854 149.072920  
H 95.072652 140.628156 150.172334  
====

====Int2A====

h 98.957944 151.113567 147.371725  
C 98.827147 150.075722 146.931767  
O 98.766273 149.909729 145.719072  
N 98.694960 149.100758 147.853772  
H 98.668273 148.104754 147.614789  
H 98.874392 149.263104 148.849190  
h 103.326979 140.588980 144.286712  
C 102.957526 141.523225 143.769537  
O 103.741742 142.353885 143.319125  
N 101.605460 141.557952 143.709794  
H 101.107953 140.822504 144.224575  
C 100.772840 142.585495 143.101794  
H 100.563704 143.387964 143.823884  
h 101.257996 143.063133 142.214260  
C 99.437404 141.969077 142.654049  
O 99.294551 140.780453 142.412711  
N 98.455311 142.890737 142.440354  
H 98.588698 143.821671 142.827603  
C 97.164110 142.649956 141.800784  
H 96.743023 143.653956 141.687917  
h 97.294663 142.214945 140.778231  
C 96.174754 141.811737 142.644482  
O 95.643631 140.797835 142.208246  
N 95.923882 142.321469 143.878309  
H 96.515435 143.059287 144.248600  
C 95.040112 141.682797 144.845844  
H 95.129517 142.278779 145.756775  
h 93.968845 141.707982 144.526188  
C 95.442010 140.228331 145.214489  
O 94.671375 139.282208 145.079560  
N 96.707616 140.106711 145.712287  
H 97.269476 140.944366 145.830905  
C 97.292742 138.819750 146.034629  
H 96.619771 138.083446 145.587044  
C 98.682812 138.635658 145.391782  
H 98.607444 138.911573 144.337494  
H 98.949734 137.581654 145.479811  
S 100.110954 139.535414 146.145552  
C 97.376392 138.401699 147.524393  
O 97.683387 137.229025 147.748990  
N 97.206726 139.361412 148.466901  
H 96.837575 140.265262 148.194867  
C 97.258600 139.177242 149.920944  
H 97.116932 140.171166 150.347542

C 96.118517 138.311032 150.443649  
H 96.199583 137.300508 150.058116  
H 96.127856 138.292606 151.544129  
O 94.893337 138.900464 149.960323  
H 94.144994 138.533044 150.519458  
h 98.249865 138.847460 150.315287  
h 98.402505 145.679767 151.565839  
C 98.019298 144.788608 152.151916  
O 97.735535 144.892052 153.343512  
N 97.886729 143.682151 151.407537  
H 98.181839 143.675860 150.433306  
C 97.439297 142.422841 151.960630  
H 97.416688 141.710469 151.139912  
H 98.153147 142.047143 152.701711  
h 96.429105 142.439932 152.422845  
h 93.622979 143.442409 152.867003  
C 92.834105 142.676927 152.688804  
H 93.179253 141.751912 153.162119  
H 91.918537 142.993834 153.202760  
O 92.511846 142.481569 151.327060  
H 93.319758 142.063789 150.957458  
h 92.811026 141.080221 148.064091  
C 93.289694 142.081693 148.185462  
H 93.286543 142.622788 147.241597  
H 92.762024 142.645431 148.952729  
C 94.680425 141.778522 148.647071  
O 95.633894 141.650107 147.912252  
O 94.696408 141.507120 149.976559  
h 93.546565 145.537972 148.990912  
C 94.431416 145.430903 148.351483  
S 95.891088 144.774615 149.088111  
C 94.448989 145.836655 147.063387  
S 95.830395 145.621313 145.986671  
h 93.587276 146.339023 146.709803  
O 105.933406 146.961840 145.639367  
H 105.539973 146.965132 144.732124  
H 105.295418 146.389093 146.102166  
Cu 99.526261 141.628457 146.730269  
S 98.573265 143.506964 145.787862  
Mo 97.655464 144.847226 147.411864  
O 98.582534 143.545287 148.672574  
O 98.579369 146.285374 147.549101  
C 99.581505 142.701197 148.401480  
O 100.493974 142.421473 149.143244  
H 95.065369 140.604497 150.176342  
====

====TS2A====

h 98.909207 151.218133 147.370926  
C 98.730946 150.186756 146.932460  
O 98.601934 150.029517 145.723518  
N 98.631300 149.210399 147.854543  
H 98.540556 148.217176 147.617840  
H 98.856263 149.362042 148.841868  
h 103.364904 140.536451 144.268121  
C 102.995030 141.473832 143.756428  
O 103.777901 142.302156 143.301356  
N 101.642483 141.517242 143.704421  
H 101.141355 140.782493 144.212079  
C 100.819259 142.557631 143.103004

H 100.648422 143.375908 143.816832  
h 101.294382 143.008631 142.195928  
C 99.461838 141.964769 142.695093  
O 99.296072 140.776737 142.461677  
N 98.488317 142.899122 142.497000  
H 98.632334 143.829223 142.883264  
C 97.191454 142.664409 141.864004  
H 96.766482 143.668148 141.762732  
h 97.319661 142.237689 140.836672  
C 96.214021 141.809600 142.703781  
O 95.716667 140.776786 142.271960  
N 95.938149 142.308843 143.936359  
H 96.433132 143.121688 144.287995  
C 95.033346 141.655807 144.873910  
H 95.102206 142.237013 145.795661  
h 93.968473 141.683611 144.532326  
C 95.430211 140.196820 145.230875  
O 94.655860 139.255227 145.089238  
N 96.691129 140.067409 145.738057  
H 97.259631 140.900847 145.853519  
C 97.276493 138.782391 146.066221  
H 96.612437 138.042911 145.611492  
C 98.679758 138.608544 145.445777  
H 98.627191 138.898078 144.393830  
H 98.948819 137.554283 145.526907  
S 100.082226 139.499101 146.261427  
C 97.352521 138.366709 147.556913  
O 97.655623 137.193179 147.781556  
N 97.188347 139.326786 148.499131  
H 96.838561 140.238318 148.227053  
C 97.246395 139.143654 149.952737  
H 97.110652 140.138856 150.378182  
C 96.102155 138.285580 150.479104  
H 96.176701 137.272195 150.099450  
H 96.109530 138.273689 151.579667  
O 94.883597 138.881086 149.988229  
H 94.128764 138.521102 150.543263  
h 98.238245 138.810643 150.343678  
h 98.411043 145.690885 151.517659  
C 98.033975 144.793722 152.097694  
O 97.769206 144.881556 153.294547  
N 97.887183 143.692764 151.343451  
H 98.173945 143.690553 150.369172  
C 97.435778 142.434230 151.898845  
H 97.391155 141.727200 151.074712  
H 98.155414 142.048273 152.630439  
h 96.432686 142.457630 152.376650  
h 93.631027 143.460426 152.847877  
C 92.843830 142.691312 152.677157  
H 93.193849 141.770085 153.155126  
H 91.929449 143.008272 153.193331  
O 92.516164 142.486696 151.318312  
H 93.322906 142.066238 150.949422  
h 92.829841 141.062388 148.060268  
C 93.309328 142.063890 148.181972  
H 93.309186 142.605317 147.238560  
H 92.778386 142.629960 148.945033  
C 94.697355 141.765832 148.654894  
O 95.661941 141.644622 147.932557  
O 94.699611 141.487734 149.983675

h 93.418973 145.548842 148.951667  
C 94.298611 145.425233 148.308012  
S 95.780233 144.805460 149.056867  
C 94.312334 145.811108 147.014732  
S 95.707634 145.589818 145.940917  
h 93.460453 146.328832 146.661248  
O 105.900023 146.967785 145.665529  
H 105.496207 146.973205 144.762897  
H 105.254995 146.413574 146.141042  
Cu 99.458476 141.611412 146.475134  
S 98.744267 143.632375 145.829316  
Mo 97.506250 144.961273 147.397030  
O 98.638595 143.591477 148.566825  
O 98.341116 146.443523 147.575974  
C 99.701345 143.256324 147.906636  
O 100.875272 143.272275 148.163770  
H 95.057271 140.581056 150.185731  
=====

====-Int3Aw====

h 98.882357 151.348967 147.382380  
C 98.671559 150.322672 146.950158  
O 98.495224 150.165422 145.747120  
N 98.588516 149.350323 147.876585  
H 98.442487 148.366327 147.630966  
H 98.861651 149.491051 148.852836  
h 103.344346 140.531469 144.245667  
C 102.976233 141.471410 143.738401  
O 103.753137 142.322683 143.318684  
N 101.625871 141.496267 143.651712  
H 101.119743 140.732335 144.106440  
C 100.812244 142.554029 143.071746  
H 100.679152 143.376325 143.789041  
h 101.275043 142.992313 142.152404  
C 99.440441 141.977782 142.697865  
O 99.269501 140.797132 142.434702  
N 98.452675 142.910994 142.571550  
H 98.630471 143.855291 142.905344  
C 97.161566 142.696160 141.914210  
H 96.733903 143.700584 141.838263  
h 97.299182 142.293235 140.877244  
C 96.192644 141.809231 142.726630  
O 95.763783 140.746057 142.295721  
N 95.867136 142.295366 143.951665  
H 96.195397 143.202333 144.269742  
C 94.950985 141.609184 144.850863  
H 94.997678 142.177312 145.779725  
h 93.892688 141.627765 144.492898  
C 95.364661 140.155102 145.194424  
O 94.599653 139.207478 145.040308  
N 96.616309 140.031634 145.729909  
H 97.185525 140.864150 145.848266  
C 97.181875 138.746118 146.090815  
H 96.482970 138.010828 145.682635  
C 98.559757 138.485625 145.443635  
H 98.484363 138.710248 144.377749  
H 98.786812 137.428133 145.586453  
S 100.015652 139.358425 146.169108  
C 97.275607 138.387483 147.593016  
O 97.556924 137.215037 147.848873

N 97.126288 139.368962 148.517353  
H 96.908806 140.313740 148.227491  
C 97.193030 139.197980 149.974774  
H 97.053099 140.192559 150.392346  
C 96.055722 138.329304 150.503535  
H 96.161270 137.306198 150.157676  
H 96.042604 138.355291 151.603049  
O 94.813873 138.856137 149.975238  
H 94.070339 138.484770 150.539578  
h 98.186095 138.857652 150.361073  
h 98.539709 145.755830 151.534619  
C 98.147997 144.856064 152.101737  
O 97.837963 144.945306 153.288854  
N 98.039181 143.753110 151.346259  
H 98.361592 143.767457 150.380130  
C 97.601320 142.489595 151.903237  
H 97.625350 141.758333 151.099096  
H 98.293573 142.153689 152.684231  
h 96.574407 142.485179 152.331699  
h 93.764665 143.457733 152.750056  
C 93.007999 142.669849 152.547313  
H 93.314239 141.777213 153.103834  
H 92.038963 142.997283 152.940682  
O 92.852392 142.402553 151.167090  
H 93.756045 142.139260 150.884093  
h 92.968557 140.946496 148.093572  
C 93.455988 141.945525 148.158521  
H 93.357764 142.467501 147.209290  
H 92.969921 142.524628 148.943443  
C 94.905972 141.789725 148.514084  
O 95.822685 141.953726 147.740255  
O 95.142574 141.448250 149.811774  
h 93.433346 145.506519 148.944025  
C 94.309396 145.383665 148.293824  
S 95.847023 144.941424 149.074714  
C 94.277323 145.655474 146.970500  
S 95.660216 145.386160 145.877915  
h 93.421876 146.168528 146.615917  
O 105.891444 146.967061 145.701670  
H 105.493634 146.964449 144.796485  
H 105.237879 146.427761 146.182448  
Cu 99.470132 141.471026 146.195830  
S 99.201505 143.683938 146.138300  
Mo 97.500794 145.089716 147.387355  
O 98.879271 144.070203 148.661108  
O 98.103983 146.683619 147.390514  
C 99.877093 143.681436 147.915019  
O 101.009332 143.397885 148.226443  
H 94.897224 140.494949 150.019325

=====

====TS3A=====

h 98.882108 151.357940 147.379222  
C 98.677014 150.333840 146.938252  
O 98.424696 150.197472 145.746109  
N 98.730469 149.331654 147.833096  
H 98.506011 148.361496 147.594556  
H 98.952853 149.475486 148.821436  
h 103.369320 140.508174 144.263305  
C 102.995184 141.448654 143.761340

O 103.772460 142.294974 143.330427  
N 101.642839 141.482413 143.699503  
H 101.141642 140.722065 144.169267  
C 100.822014 142.542364 143.131472  
H 100.667443 143.346265 143.865743  
h 101.288905 143.009281 142.227658  
C 99.458036 141.965766 142.727770  
O 99.285036 140.784314 142.472133  
N 98.480023 142.904938 142.566652  
H 98.651655 143.850304 142.900406  
C 97.191865 142.684368 141.906736  
H 96.764040 143.688157 141.820849  
h 97.330781 142.273852 140.873533  
C 96.222439 141.805327 142.725906  
O 95.770388 140.752544 142.293195  
N 95.924132 142.289596 143.958045  
H 96.286067 143.182319 144.275817  
C 95.020660 141.609504 144.873800  
H 95.072723 142.182723 145.799926  
h 93.957735 141.620929 144.524718  
C 95.446430 140.160221 145.222111  
O 94.667662 139.216153 145.120650  
N 96.723535 140.030663 145.692383  
H 97.316102 140.851804 145.765910  
C 97.276824 138.735855 146.044193  
H 96.571447 138.011613 145.627233  
C 98.652650 138.463862 145.393790  
H 98.587929 138.745499 144.340945  
H 98.843288 137.393778 145.482723  
S 100.149301 139.229452 146.156946  
C 97.349816 138.364108 147.543977  
O 97.622172 137.190118 147.799964  
N 97.190624 139.345041 148.468043  
H 96.927849 140.278079 148.175534  
C 97.238961 139.179135 149.925913  
H 97.092012 140.175611 150.339897  
C 96.103304 138.305597 150.449511  
H 96.212451 137.286554 150.096033  
H 96.087672 138.323756 151.549190  
O 94.862919 138.836740 149.923049  
H 94.118461 138.474730 150.492732  
h 98.227749 138.843893 150.325915  
h 98.477020 145.745648 151.502047  
C 98.092652 144.848274 152.077716  
O 97.815480 144.937831 153.272631  
N 97.956532 143.746477 151.324244  
H 98.248804 143.758629 150.349277  
C 97.530680 142.486034 151.898157  
H 97.532697 141.749341 151.098882  
H 98.240757 142.154376 152.664597  
h 96.514581 142.490649 152.348835  
h 93.704308 143.465917 152.774787  
C 92.938969 142.682726 152.581766  
H 93.257622 141.784504 153.122418  
H 91.984017 143.010394 153.009176  
O 92.734223 142.425608 151.207010  
H 93.608883 142.094251 150.901806  
h 92.947432 140.971379 148.096091  
C 93.433191 141.972445 148.171642  
H 93.368438 142.492721 147.218559

H 92.932637 142.554310 148.944680  
C 94.861436 141.764829 148.574871  
O 95.806521 141.821594 147.820015  
O 95.006548 141.449281 149.895599  
h 93.290395 145.554548 148.908835  
C 94.161386 145.420639 148.255698  
S 95.694421 144.939712 149.025365  
C 94.137197 145.710344 146.937334  
S 95.513846 145.432912 145.842268  
h 93.292370 146.237958 146.583399  
O 105.902447 146.983791 145.684740  
H 105.496050 146.997572 144.783439  
H 105.264654 146.416820 146.154680  
Cu 99.699080 141.332250 146.500674  
S 98.894938 145.589974 146.091398  
Mo 97.343947 143.145624 147.347272  
O 98.738934 144.101700 148.614536  
O 97.952074 146.738889 147.370357  
C 99.518173 143.439918 147.824668  
O 100.479184 142.729830 148.121745  
H 94.962933 140.456671 150.054658

====

====Int4A====

h 98.876412 151.374132 147.367595  
C 98.669790 150.353907 146.918296  
O 98.358313 150.234168 145.738619  
N 98.823979 149.332330 147.780555  
H 98.532866 148.375852 147.557220  
H 99.002753 149.476557 148.778256  
h 103.394857 140.486140 144.240783  
C 103.013257 141.425671 143.739393  
O 103.789439 142.230437 143.232469  
N 101.660858 141.503886 143.798773  
H 101.193735 140.739727 144.298983  
C 100.782587 142.577000 143.348912  
H 100.506009 143.206271 144.207940  
h 101.257252 143.254341 142.595740  
C 99.483844 141.981559 142.773663  
O 99.350356 140.801380 142.491122  
N 98.503020 142.907649 142.554115  
H 98.632818 143.848318 142.918258  
C 97.222208 142.663260 141.890837  
H 96.788967 143.662730 141.780488  
h 97.365169 142.233603 140.867016  
C 96.254477 141.799060 142.726957  
O 95.772685 140.757270 142.299405  
N 95.992276 142.284619 143.966466  
H 96.402411 143.154469 144.285211  
C 95.113388 141.611087 144.910313  
H 95.175887 142.192393 145.832166  
h 94.043891 141.613719 144.575600  
C 95.557174 140.166455 145.259688  
O 94.780709 139.219148 145.180165  
N 96.852754 140.035089 145.688860  
H 97.434818 140.862261 145.772008  
C 97.387366 138.726964 146.030327  
H 96.651594 138.027773 145.621040  
C 98.729781 138.382025 145.341698  
H 98.658339 138.704965 144.302156

H 98.835802 137.300053 145.393974  
S 100.357128 138.959382 146.020039  
C 97.466618 138.340481 147.524471  
O 97.755108 137.169017 147.769368  
N 97.315606 139.320121 148.453213  
H 96.916519 140.210596 148.176724  
C 97.351065 139.143823 149.911167  
H 97.226226 140.144053 150.329160  
C 96.200161 138.292646 150.437857  
H 96.271032 137.281660 150.050794  
H 96.218100 138.271497 151.538503  
O 94.980317 138.895166 149.965229  
H 94.227657 138.524296 150.514051  
h 98.334094 138.799854 150.312983  
h 98.368340 145.725244 151.480546  
C 97.991178 144.830852 152.064938  
O 97.760508 144.914071 153.269613  
N 97.810669 143.738748 151.305932  
H 98.067562 143.753610 150.320585  
C 97.387882 142.478555 151.879349  
H 97.339727 141.758869 151.066014  
H 98.122955 142.114323 152.606829  
h 96.392846 142.497155 152.371156  
h 93.590682 143.489203 152.849824  
C 92.804684 142.719869 152.677373  
H 93.139035 141.806442 153.181217  
H 91.880803 143.050586 153.167034  
O 92.508851 142.492212 151.314417  
H 93.325730 142.073012 150.968533  
h 92.884743 141.022814 148.085062  
C 93.361667 142.028832 148.187646  
H 93.362527 142.553001 147.235013  
H 92.828537 142.612014 148.936519  
C 94.747340 141.750016 148.674758  
O 95.723426 141.617976 147.967109  
O 94.733163 141.498184 150.007121  
h 93.107115 145.613880 148.858911  
C 93.976178 145.469746 148.206952  
S 95.486901 144.912419 148.968687  
C 93.983553 145.820474 146.904530  
S 95.375559 145.577430 145.824171  
h 93.150797 146.364222 146.550831  
O 105.895401 147.000387 145.674056  
H 105.470110 147.033733 144.782231  
H 105.267789 146.422993 146.144823  
Cu 100.043283 140.742524 147.147070  
S 98.548900 143.604373 146.064640  
Mo 97.174683 145.236491 147.341577  
O 98.481423 144.050712 148.575626  
O 97.826371 146.813207 147.437797  
C 99.065843 143.253080 147.752639  
O 99.843685 142.342733 148.129557  
H 95.155226 140.628288 150.229906

====

====TS4A====

h 98.902499 151.263418 147.372337  
C 98.715059 150.231631 146.939478  
O 98.585974 150.065042 145.731946  
N 98.605348 149.265160 147.870112

H 98.504473 148.269776 147.643968  
H 98.836354 149.423561 148.854871  
h 103.354499 140.518515 144.225065  
C 102.995109 141.455932 143.703931  
O 103.789815 142.257786 143.221731  
N 101.643416 141.525647 143.688756  
H 101.150945 140.796215 144.212525  
C 100.796313 142.575212 143.135961  
H 100.561233 143.318894 143.910535  
h 101.280550 143.128340 142.294226  
C 99.477867 141.961080 142.633319  
O 99.363907 140.781745 142.334041  
N 98.485870 142.877947 142.448819  
H 98.570157 143.761607 142.949232  
C 97.192208 142.639263 141.812519  
H 96.767194 143.643337 141.712027  
h 97.320421 142.216670 140.784305  
C 96.201920 141.789595 142.644688  
O 95.658006 140.791127 142.187441  
N 95.959778 142.270110 143.892374  
H 96.564777 142.990128 144.283267  
C 95.052619 141.626221 144.834411  
H 95.136377 142.206432 145.755552  
h 93.985290 141.668868 144.503040  
C 95.427214 140.161108 145.195377  
O 94.647714 139.225518 145.040570  
N 96.677774 140.025114 145.725223  
H 97.249182 140.858266 145.844531  
C 97.264315 138.745186 146.065165  
H 96.603436 137.998358 145.617808  
C 98.673543 138.569534 145.455403  
H 98.620658 138.816255 144.392489  
H 98.956846 137.522444 145.576720  
S 100.049605 139.522712 146.248487  
C 97.339847 138.349391 147.560392  
O 97.640911 137.178744 147.802220  
N 97.175556 139.319700 148.492508  
H 96.846597 140.234985 148.208816  
C 97.233223 139.146900 149.946580  
H 97.090804 140.142694 150.368439  
C 96.092184 138.284463 150.473116  
H 96.175693 137.269890 150.099256  
H 96.091566 138.280327 151.573575  
O 94.870847 138.866886 149.969670  
H 94.115748 138.509141 150.526432  
h 98.225624 138.817900 150.340454  
h 98.490577 145.727230 151.535565  
C 98.104689 144.816306 152.087879  
O 97.859950 144.859672 153.289497  
N 97.937070 143.739298 151.299610  
H 98.132489 143.802988 150.312256  
C 97.468917 142.467488 151.814923  
H 97.407513 141.788271 150.969101  
H 98.189304 142.052497 152.529944  
h 96.469917 142.484916 152.301955  
h 93.670584 143.459156 152.815932  
C 92.899857 142.673486 152.642690  
H 93.277648 141.753286 153.101931  
H 91.984228 142.960333 153.174181  
O 92.561206 142.481932 151.285137

H 93.368911 142.071951 150.905439  
h 92.846410 141.052410 148.043844  
C 93.329660 142.053120 148.155108  
H 93.325932 142.585753 147.206702  
H 92.803691 142.627823 148.915235  
C 94.720570 141.760944 148.621967  
O 95.684573 141.658205 147.896790  
O 94.738692 141.476332 149.952478  
h 93.416237 145.544208 148.971754  
C 94.296776 145.432496 148.328578  
S 95.802027 144.805684 149.053946  
C 94.317883 145.868418 147.054379  
S 95.734890 145.731756 145.995292  
h 93.461616 146.377360 146.702374  
O 105.882691 146.964778 145.682152  
H 105.486923 146.976541 144.776084  
H 105.228089 146.415139 146.149781  
Cu 99.332733 141.611597 146.258571  
S 98.557861 143.615483 145.738098  
Mo 97.488834 145.034253 147.397820  
O 99.381280 143.999131 148.516240  
O 98.301282 146.526774 147.631741  
C 100.248745 144.024815 147.677149  
O 101.329957 144.206371 147.252123  
H 95.029681 140.540221 150.140663  
====

====Int5A====

h 99.043356 151.008709 147.327561  
C 98.999321 149.971084 146.871384  
O 99.163391 149.800813 145.668472  
N 98.685251 149.008887 147.761677  
H 98.739123 148.001265 147.567044  
H 98.711317 149.194330 148.770391  
h 103.212939 140.824520 144.697289  
C 102.743638 141.780477 144.328276  
O 103.365543 142.842984 144.309998  
N 101.491955 141.587360 143.869892  
H 101.049429 140.691678 144.084220  
C 100.641215 142.624297 143.305633  
H 100.358201 143.348880 144.077374  
h 101.162716 143.187724 142.490496  
C 99.370627 141.975944 142.747135  
O 99.289841 140.786029 142.475485  
N 98.376764 142.868771 142.492874  
H 98.447089 143.787816 142.923595  
C 97.111043 142.597085 141.817864  
H 96.673045 143.592410 141.690234  
h 97.274339 142.164139 140.799577  
C 96.114334 141.750209 142.642035  
O 95.526248 140.792027 142.154851  
N 95.924253 142.200154 143.908248  
H 96.603139 142.839054 144.322600  
C 95.030601 141.560117 144.866042  
H 95.136455 142.137438 145.786737  
h 93.959438 141.614966 144.549977  
C 95.411446 140.094418 145.216510  
O 94.638868 139.156502 145.041655  
N 96.666099 139.965388 145.740276  
H 97.203959 140.811810 145.911663



C 97.249788 138.686550 146.094505  
 H 96.579122 137.941592 145.657668  
 C 98.655839 138.472691 145.481319  
 H 98.612062 138.760741 144.428608  
 H 98.886137 137.409506 145.564935  
 S 100.101102 139.303637 146.294780  
 C 97.328056 138.305383 147.591346  
 O 97.638570 137.138950 147.837897  
 N 97.167139 139.281885 148.516876  
 H 96.792576 140.180744 148.234478  
 C 97.210271 139.113147 149.971167  
 H 97.066045 140.109998 150.389192  
 C 96.060972 138.259835 150.493388  
 H 96.132834 137.244640 150.116969  
 H 96.061416 138.251361 151.594182  
 O 94.849007 138.861603 149.993121  
 H 94.090079 138.511314 150.549165  
 h 98.197648 138.787795 150.378121  
 h 98.373898 145.689490 151.510845  
 C 98.056200 144.756640 152.063051  
 O 97.918145 144.749150 153.282118  
 N 97.866378 143.701255 151.249709  
 H 97.847055 143.842894 150.248002  
 C 97.399844 142.427175 151.756099  
 H 97.309709 141.764290 150.900827  
 H 98.133873 141.997095 152.446789  
 h 96.414657 142.452668 152.269693  
 h 93.641749 143.456812 152.852458  
 C 92.858098 142.682056 152.689513  
 H 93.236687 141.753019 153.128372  
 H 91.959047 142.973343 153.246255  
 O 92.485041 142.510208 151.338002  
 H 93.273019 142.079479 150.941724  
 h 92.775055 141.050742 148.066382  
 C 93.261323 142.048985 148.183798  
 H 93.277389 142.579661 147.234414  
 H 92.732581 142.628235 148.938454  
 C 94.640214 141.719173 148.660510  
 O 95.589153 141.528572 147.935314  
 O 94.632686 141.468130 149.995493  
 h 93.488293 145.595772 148.932317  
 C 94.375074 145.526886 148.293385  
 S 95.841886 144.727881 148.924685  
 C 94.440249 146.127483 147.094117  
 S 95.919887 146.155411 146.102666  
 h 93.573410 146.621360 146.748982  
 O 106.024809 147.004425 145.563704  
 H 105.652433 147.127830 144.658699  
 H 105.332132 146.441150 145.951884  
 Cu 99.414400 141.387106 146.499277  
 S 98.348717 143.250919 146.008409  
 Mo 97.564491 144.992545 147.314496  
 O 101.514950 144.561459 145.734539  
 O 98.687177 146.201838 147.834113  
 C 102.618104 144.890211 145.896754  
 O 103.712101 145.268636 146.082917  
 H 95.018671 140.577670 150.212501  
 =====

====Int6A=====

h -4.527838 6.632583 -1.819392  
 C -3.615244 5.956770 -1.768546  
 O -2.665818 6.133084 -2.522792  
 N -3.720859 4.954008 -0.872552  
 H -2.948862 4.325961 -0.622982  
 H -4.475606 4.923126 -0.180401  
 h 5.703386 3.771363 3.620806  
 C 5.365049 4.280628 2.668978  
 O 5.352953 5.504272 2.567071  
 N 5.021611 3.373569 1.724414  
 H 5.028316 2.394329 2.021540  
 C 4.559694 3.617461 0.362448  
 H 3.472186 3.752595 0.344005  
 h 5.011423 4.538165 -0.081822  
 C 4.918418 2.419331 -0.528825  
 O 5.861456 1.676713 -0.293679  
 N 4.165498 2.351420 -1.662311  
 H 3.242184 2.786270 -1.629487  
 C 4.386829 1.464196 -2.802413  
 H 3.705729 1.854285 -3.566072  
 h 5.430435 1.564569 -3.192563  
 C 4.015459 -0.019576 -2.563637  
 O 4.802881 -0.930997 -2.795730  
 N 2.742217 -0.212380 -2.129839  
 H 2.214323 0.573620 -1.738097  
 C 2.181485 -1.529686 -1.859356  
 H 1.175568 -1.334326 -1.478138  
 h 2.079382 -2.156232 -2.781074  
 C 2.934260 -2.338312 -0.766309  
 O 3.392551 -3.458980 -0.969339  
 N 3.005192 -1.701805 0.440883  
 H 2.617301 -0.762787 0.521098  
 C 3.773270 -2.215714 1.557228  
 H 4.377111 -3.028353 1.144503  
 C 4.728795 -1.154472 2.149097  
 H 5.324515 -0.738294 1.333368  
 H 5.384543 -1.662949 2.858292  
 S 3.957395 0.223251 3.118613  
 C 2.988870 -2.864056 2.721995  
 O 3.640197 -3.459993 3.580047  
 N 1.650127 -2.644980 2.764908  
 H 1.203900 -2.255821 1.946838  
 C 0.702505 -3.109512 3.778294  
 H -0.260273 -2.670186 3.508188  
 C 0.503679 -4.620918 3.750594  
 H 1.427053 -5.134002 3.995817  
 H -0.288412 -4.919187 4.453837  
 O 0.127505 -4.956675 2.398217  
 H -0.253544 -5.885835 2.409754  
 h 0.898027 -2.730191 4.810264  
 h -4.303806 1.488568 2.767123  
 C -4.259503 0.478564 3.272723  
 O -5.245762 -0.002530 3.821992  
 N -3.053746 -0.109004 3.186535  
 H -2.287178 0.345647 2.707073  
 C -2.790687 -1.405837 3.773142  
 H -1.748801 -1.648581 3.573719  
 H -2.912615 -1.365680 4.860813  
 h -3.413340 -2.241068 3.384606  
 h -5.193932 -3.681036 1.423912

C -4.808645 -4.680660 1.118499  
 H -4.464330 -5.181710 2.029921  
 H -5.642241 -5.265615 0.711630  
 O -3.799200 -4.634331 0.131008  
 H -3.040227 -4.236802 0.607844  
 h -0.420130 -4.394762 -1.046096  
 C -0.990056 -3.433070 -1.076628  
 H -0.618470 -2.790796 -1.871521  
 H -2.048634 -3.642319 -1.223455  
 C -0.805539 -2.814177 0.269569  
 O 0.033517 -1.972788 0.539867  
 O -1.582338 -3.414680 1.199371  
 h -3.765363 -1.338732 -2.095832  
 C -2.986370 -0.606652 -1.860127  
 S -2.686353 -0.261075 -0.150119  
 C -2.344346 0.115746 -2.801345  
 S -1.087214 1.325095 -2.439347  
 h -2.646573 -0.040694 -3.804087  
 O -0.564405 0.480957 1.836743  
 H 0.368281 0.726058 2.091257  
 H -0.526923 -0.486122 1.647572  
 Cu 2.477601 1.138577 1.740481  
 S 1.315512 1.956127 0.054670  
 Mo -1.103703 1.541158 -0.066311  
 O 2.442343 5.682637 1.426464  
 O -1.950113 3.008676 0.209123  
 C 1.545543 5.368977 2.109586  
 O 0.659852 5.097289 2.823465  
 H -1.048099 -3.850501 1.924169

====

====Int1'====

h 98.878114 151.380819 147.408061  
 C 98.646740 150.355555 146.987203  
 O 98.509359 150.184050 145.782820  
 N 98.477391 149.404168 147.927805  
 H 98.327942 148.423615 147.668203  
 H 98.749142 149.541226 148.904985  
 h 103.367494 140.668263 144.072725  
 C 103.000067 141.616384 143.573611  
 O 103.787145 142.438639 143.109821  
 N 101.647994 141.666866 143.590065  
 H 101.170650 140.898623 144.080755  
 C 100.742296 142.702213 143.112322  
 H 100.439147 143.344627 143.951756  
 h 101.205886 143.372015 142.350027  
 C 99.477417 142.044518 142.520140  
 O 99.466771 140.903558 142.083822  
 N 98.407606 142.888571 142.462319  
 H 98.474056 143.759603 142.986268  
 C 97.120701 142.656296 141.807689  
 H 96.691327 143.660135 141.723851  
 h 97.256613 142.250602 140.773045  
 C 96.124486 141.785870 142.619160  
 O 95.598170 140.786231 142.143639  
 N 95.864349 142.245413 143.870616  
 H 96.438541 142.990644 144.266335  
 C 94.950895 141.593498 144.802067  
 H 95.032916 142.167216 145.728304  
 h 93.886869 141.641375 144.466262

C 95.321238 140.125632 145.159734  
 O 94.554927 139.184997 144.980230  
 N 96.551405 140.011451 145.739447  
 H 97.126073 140.849100 145.779068  
 C 97.217389 138.757641 146.017386  
 H 96.560976 137.981144 145.614412  
 C 98.571063 138.670983 145.274838  
 H 98.368201 138.793791 144.208505  
 H 98.987942 137.678022 145.456175  
 S 99.884789 139.869823 145.775192  
 C 97.417495 138.352184 147.503003  
 O 97.808873 137.201997 147.712479  
 N 97.225832 139.298303 148.455810  
 H 96.822030 140.186942 148.183018  
 C 97.291010 139.138765 149.912484  
 H 97.169483 140.145777 150.318464  
 C 96.130447 138.312729 150.459691  
 H 96.169513 137.296777 150.076777  
 H 96.163197 138.290586 151.560625  
 O 94.921519 138.946382 150.004644  
 H 94.165854 138.557270 150.537134  
 h 98.274675 138.802440 150.328267  
 h 98.287676 145.815245 151.576046  
 C 97.931683 144.891303 152.127504  
 O 97.722219 144.920637 153.337499  
 N 97.772679 143.822656 151.328209  
 H 97.925906 143.919673 150.320874  
 C 97.362317 142.536592 151.856706  
 H 97.320395 141.845317 151.018233  
 H 98.101558 142.157667 152.573634  
 h 96.370983 142.526641 152.355108  
 h 93.564595 143.495893 152.876029  
 C 92.769189 142.741846 152.680405  
 H 93.107355 141.798314 153.123174  
 H 91.858933 143.051131 153.208483  
 O 92.445787 142.597156 151.310778  
 H 93.228685 142.131669 150.946327  
 h 92.807399 141.074172 148.031416  
 C 93.279364 142.078697 148.151646  
 H 93.304065 142.603677 147.199353  
 H 92.729584 142.658407 148.890930  
 C 94.655722 141.788308 148.660582  
 O 95.635287 141.638542 147.967932  
 O 94.617839 141.558435 149.998547  
 h 93.174078 145.659845 148.912245  
 C 94.032010 145.541565 148.240542  
 S 95.530209 144.954520 148.937318  
 C 94.006005 145.913730 146.938599  
 S 95.345426 145.744305 145.839032  
 h 93.139983 146.416192 146.605000  
 Cu 98.913501 141.892459 146.291981  
 S 98.204474 143.949483 145.521194  
 Mo 97.363786 145.186080 147.307525  
 O 98.244834 144.511058 148.662842  
 O 97.927906 146.814591 147.173771  
 C 98.874891 141.884721 148.253912  
 N 99.526886 141.826372 149.232133  
 H 95.106973 140.737215 150.256405  
 C 100.680233 141.785267 150.055231  
 H 100.373701 141.540341 151.077654

H 101.297197 140.966968 149.670144  
 C 101.466488 143.103987 150.030636  
 H 102.382653 142.923981 150.615372  
 H 100.887443 143.862808 150.570227  
 C 101.810649 143.616452 148.633873  
 H 100.884474 143.848821 148.098452  
 H 102.317410 142.824079 148.063983  
 C 102.693412 144.863232 148.677669  
 H 103.645763 144.663073 149.190589  
 H 102.923932 145.219951 147.668740  
 H 102.193637 145.678750 149.215503

=====

====TS1'====

h 98.937657 151.279963 147.361872  
 C 98.739368 150.246028 146.938952  
 O 98.472298 150.096371 145.753103  
 N 98.831408 149.246075 147.837276  
 H 98.572449 148.280463 147.613946  
 H 99.002846 149.410973 148.833149  
 h 103.287433 140.944802 143.954039  
 C 102.839743 141.875074 143.492531  
 O 103.546617 142.782109 143.059558  
 N 101.488744 141.824952 143.499977  
 H 101.056212 141.033386 143.993207  
 C 100.549808 142.826444 143.020185  
 H 100.263266 143.505001 143.837417  
 h 100.974565 143.465192 142.208835  
 C 99.275386 142.135127 142.498985  
 O 99.239472 140.962824 142.155351  
 N 98.219066 142.987325 142.377781  
 H 98.302108 143.896180 142.828248  
 C 96.942715 142.710162 141.727587  
 H 96.478753 143.697023 141.644619  
 h 97.097431 142.307159 140.695370  
 C 95.985120 141.812656 142.551456  
 O 95.453022 140.816817 142.076651  
 N 95.776800 142.258712 143.817205  
 H 96.382846 142.985903 144.197918  
 C 94.907778 141.608609 144.789947  
 H 95.015274 142.198257 145.703762  
 h 93.833615 141.636416 144.489099  
 C 95.318866 140.154104 145.142093  
 O 94.578442 139.193794 144.962992  
 N 96.562661 140.070021 145.699910  
 H 97.120817 140.918162 145.742464  
 C 97.243529 138.818957 145.959514  
 H 96.604736 138.044346 145.526933  
 C 98.609743 138.768775 145.244101  
 H 98.437885 138.945866 144.180585  
 H 99.028311 137.770605 145.388618  
 S 99.909853 139.946403 145.832040  
 C 97.416807 138.389289 147.438557  
 O 97.803629 137.237564 147.644653  
 N 97.219125 139.339073 148.383377  
 H 96.821020 140.224140 148.097573  
 C 97.211570 139.187806 149.840787  
 H 97.051829 140.197236 150.219448  
 C 96.053319 138.327927 150.357366  
 H 96.282370 137.272792 150.222849

H 95.936803 138.514681 151.439285  
 O 94.862617 138.661849 149.639282  
 H 94.113821 138.400678 150.253406  
 h 98.187117 138.879025 150.298014  
 h 98.279556 145.767888 151.451063  
 C 97.932256 144.865594 152.036748  
 O 97.758037 144.924416 153.252802  
 N 97.749046 143.778990 151.271636  
 H 97.843269 143.830227 150.250338  
 C 97.384788 142.519104 151.876262  
 H 97.443079 141.747809 151.107332  
 H 98.107860 142.244954 152.651942  
 h 96.377832 142.502419 152.347476  
 h 93.578279 143.494359 152.866704  
 C 92.779786 142.744125 152.669297  
 H 93.101020 141.800961 153.124427  
 H 91.864749 143.067287 153.179669  
 O 92.479157 142.592474 151.294183  
 H 93.272237 142.131539 150.951672  
 h 92.911532 140.978058 148.093562  
 C 93.384922 141.982213 148.177578  
 H 93.405371 142.470330 147.206603  
 H 92.829219 142.598752 148.883690  
 C 94.779526 141.801982 148.691787  
 O 95.787065 141.775029 148.022866  
 O 94.728327 141.586524 150.025236  
 h 93.010563 145.744170 148.856725  
 C 93.872083 145.618403 148.194235  
 S 95.327498 144.936487 148.893630  
 C 93.878463 146.014874 146.902680  
 S 95.225836 145.794419 145.806833  
 h 93.033039 146.542334 146.559296  
 Cu 99.052847 141.968041 146.346615  
 S 98.057390 143.958800 145.494670  
 Mo 97.148056 145.117279 147.242404  
 O 97.905870 144.075524 148.516573  
 O 97.885166 146.675000 147.357839  
 C 99.165650 142.652341 148.175093  
 N 99.716808 142.408304 149.209558  
 H 95.598704 141.445531 150.452186  
 C 100.906971 141.892412 149.793566  
 H 100.639750 141.379314 150.723555  
 H 101.375513 141.159034 149.122237  
 C 101.857605 143.056872 150.104908  
 H 102.744600 142.630118 150.601354  
 H 101.367487 143.702269 150.845770  
 C 102.281593 143.892746 148.902584  
 H 101.393601 144.287095 148.397260  
 H 102.800679 143.256336 148.172020  
 C 103.185184 145.047473 149.324840  
 H 104.097402 144.681283 149.819370  
 H 103.492375 145.654285 148.466308  
 H 102.671897 145.707829 150.035720

=====

====Int2'====

h 98.921040 151.231178 147.367765  
 C 98.719773 150.196746 146.947643  
 O 98.593828 150.021235 145.741693  
 N 98.590774 149.238044 147.885607

H 98.475420 148.244825 147.657586  
 H 98.799530 149.404345 148.874118  
 h 103.324201 140.868737 143.877229  
 C 102.881865 141.774329 143.363966  
 O 103.590571 142.601898 142.797502  
 N 101.535689 141.784804 143.492539  
 H 101.125113 141.007275 144.024584  
 C 100.571197 142.795288 143.090913  
 H 100.236673 143.347879 143.980615  
 h 100.989918 143.558094 142.392462  
 C 99.334721 142.114274 142.475836  
 O 99.325851 140.955393 142.091099  
 N 98.262465 142.948757 142.366226  
 H 98.329349 143.852408 142.828896  
 C 96.989731 142.673105 141.709764  
 H 96.535995 143.663597 141.608340  
 h 97.140041 142.252515 140.684293  
 C 96.021955 141.799646 142.545089  
 O 95.453422 140.823136 142.072033  
 N 95.843853 142.245341 143.815516  
 H 96.491970 142.931778 144.200094  
 C 94.966361 141.618307 144.795300  
 H 95.078882 142.215670 145.703422  
 h 93.892594 141.658349 144.492906  
 C 95.360237 140.164120 145.169232  
 O 94.598516 139.213327 145.024300  
 N 96.613724 140.064889 145.702063  
 H 97.182037 140.905759 145.743707  
 C 97.260420 138.802459 145.990298  
 H 96.586791 138.036404 145.595053  
 C 98.606026 138.677479 145.242841  
 H 98.408851 138.842538 144.181789  
 H 98.977531 137.661876 145.393311  
 S 99.981904 139.778948 145.786624  
 C 97.449570 138.402200 147.477432  
 O 97.811753 137.244453 147.696273  
 N 97.278881 139.359137 148.426391  
 H 96.861175 140.242528 148.155997  
 C 97.307556 139.175673 149.882319  
 H 97.167225 140.173114 150.303415  
 C 96.152466 138.318741 150.393302  
 H 96.228959 137.309839 150.001354  
 H 96.159715 138.288202 151.493996  
 O 94.931286 138.918232 149.917487  
 H 94.182813 138.534764 150.465874  
 h 98.282316 138.835245 150.310289  
 h 98.230870 145.785301 151.539401  
 C 97.881413 144.872141 152.110449  
 O 97.653191 144.933995 153.315130  
 N 97.745095 143.773429 151.346381  
 H 97.943301 143.799029 150.348968  
 C 97.341103 142.500887 151.913838  
 H 97.295864 141.785548 151.096201  
 H 98.085004 142.142836 152.634651  
 h 96.349926 142.503341 152.410061  
 h 93.535670 143.482445 152.871835  
 C 92.736735 142.734185 152.671666  
 H 93.040887 141.802290 153.161036  
 H 91.811869 143.075874 153.151752  
 O 92.467002 142.545955 151.295629

H 93.271908 142.090903 150.964653  
 h 92.821861 141.076988 148.048779  
 C 93.298007 142.080498 148.165879  
 H 93.308000 142.609977 147.215585  
 H 92.760747 142.655278 148.918239  
 C 94.682443 141.786750 148.649698  
 O 95.649978 141.654720 147.934584  
 O 94.675291 141.525287 149.984294  
 h 93.257979 145.647382 148.965594  
 C 94.129300 145.534386 148.312461  
 S 95.597953 144.861303 149.029110  
 C 94.147919 145.969183 147.034248  
 S 95.518125 145.779796 145.943503  
 h 93.289930 146.481244 146.691880  
 Cu 99.253243 141.835280 146.385416  
 S 98.191245 143.728605 145.642526  
 Mo 97.338486 145.035592 147.364621  
 O 98.415926 143.704947 148.512269  
 O 98.237569 146.487395 147.527146  
 C 99.255296 142.802092 148.072700  
 N 100.157178 142.098672 148.583043  
 H 95.080391 140.641165 150.188821  
 C 100.569227 141.975475 149.964169  
 H 99.703274 141.911316 150.639182  
 H 101.110380 141.030392 150.044851  
 C 101.463864 143.130805 150.413188  
 H 101.835314 142.877144 151.421071  
 H 100.843082 144.027914 150.532823  
 C 102.651146 143.463928 149.513495  
 H 102.288580 143.769638 148.526428  
 H 103.262011 142.563452 149.353812  
 C 103.511262 144.569616 150.128497  
 H 103.927829 144.255131 151.096041  
 H 104.357138 144.834086 149.482411  
 H 102.924262 145.479593 150.303383  
 =====

====='TS2'=====

h 98.927286 151.258384 147.368570  
 C 98.727246 150.222568 146.952152  
 O 98.614246 150.040575 145.746106  
 N 98.574286 149.271564 147.894447  
 H 98.459582 148.277550 147.667121  
 H 98.798642 149.437109 148.879839  
 h 103.289111 140.922026 144.167917  
 C 102.831267 141.850181 143.719085  
 O 103.507960 142.827911 143.411595  
 N 101.496477 141.722629 143.552051  
 H 101.041740 140.899685 143.961406  
 C 100.630897 142.727144 142.958672  
 H 100.434323 143.545847 143.664985  
 h 101.086569 143.182093 142.043214  
 C 99.299099 142.081174 142.560557  
 O 99.176190 140.888559 142.321146  
 N 98.293116 142.980527 142.377845  
 H 98.428676 143.920308 142.741522  
 C 97.011710 142.704430 141.740086  
 H 96.550266 143.691741 141.649573  
 h 97.158819 142.289125 140.711115  
 C 96.064157 141.816628 142.579461

O 95.507674 140.831938 142.109463  
 N 95.885181 142.257086 143.851321  
 H 96.500575 142.974417 144.227008  
 C 94.998125 141.623068 144.817033  
 H 95.097703 142.214927 145.729402  
 h 93.925690 141.659752 144.503834  
 C 95.388849 140.166961 145.188135  
 O 94.608825 139.226405 145.070678  
 N 96.652377 140.047024 145.690244  
 H 97.245940 140.871788 145.718544  
 C 97.254741 138.770287 146.011983  
 H 96.570937 138.018307 145.607977  
 C 98.622990 138.591895 145.318094  
 H 98.483865 138.792426 144.254070  
 H 98.933465 137.555315 145.462346  
 S 100.022936 139.604390 145.957056  
 C 97.394610 138.388616 147.506537  
 O 97.722000 137.225564 147.748864  
 N 97.232287 139.361023 148.440096  
 H 96.852014 140.257375 148.157817  
 C 97.258632 139.181487 149.895556  
 H 97.107810 140.176971 150.316812  
 C 96.112224 138.312155 150.402578  
 H 96.203684 137.302679 150.016022  
 H 96.108974 138.290396 151.503203  
 O 94.888259 138.895494 149.909427  
 H 94.140596 138.523209 150.467664  
 h 98.238460 138.848082 150.315846  
 h 98.279949 145.788259 151.502004  
 C 97.938709 144.873101 152.074614  
 O 97.699148 144.938466 153.277291  
 N 97.825872 143.765182 151.319333  
 H 98.035667 143.780954 150.325555  
 C 97.430237 142.496990 151.902519  
 H 97.427014 141.759868 151.102974  
 H 98.161454 142.176319 152.653230  
 h 96.425118 142.488367 152.375802  
 h 93.605636 143.457504 152.837963  
 C 92.815705 142.699469 152.638623  
 H 93.143485 141.765457 153.108945  
 H 91.892098 143.018373 153.136929  
 O 92.529098 142.526532 151.264617  
 H 93.336124 142.084402 150.920026  
 h 92.838246 141.069442 148.050279  
 C 93.318637 142.072261 148.154869  
 H 93.313477 142.598295 147.202756  
 H 92.791885 142.650590 148.911595  
 C 94.710943 141.785768 148.620527  
 O 95.672375 141.674271 147.893780  
 O 94.730162 141.514273 149.954885  
 h 93.295781 145.616884 148.950523  
 C 94.163752 145.493252 148.292955  
 S 95.649910 144.856940 149.016442  
 C 94.167170 145.887339 147.001500  
 S 95.538801 145.671186 145.903924  
 h 93.308829 146.398812 146.658319  
 Cu 99.372561 141.713945 146.340362  
 S 98.444121 143.723346 145.681878  
 Mo 97.363778 145.048392 147.343306  
 O 98.555601 143.723022 148.460471

O 98.192824 146.537796 147.511001  
 C 99.469885 143.062574 147.832391  
 N 100.547843 142.483016 148.132951  
 H 95.054434 140.591552 150.142765  
 C 100.927746 142.105824 149.489983  
 H 100.043116 141.797228 150.068120  
 H 101.577150 141.229353 149.400249  
 C 101.649012 143.213525 150.253560  
 H 101.932826 142.785549 151.231790  
 H 100.937499 144.020163 150.470702  
 C 102.894861 143.797678 149.590252  
 H 102.610411 144.324837 148.672945  
 H 103.565047 142.982144 149.281303  
 C 103.642779 144.739297 150.538034  
 H 103.990784 144.202260 151.431160  
 H 104.526477 145.180649 150.060563  
 H 102.998954 145.560232 150.877992

=====

====Int3'====

h 98.920202 151.361377 147.383042  
 C 98.718479 150.330070 146.957900  
 O 98.396019 150.185860 145.784948  
 N 98.902233 149.323869 147.835163  
 H 98.602458 148.365525 147.629173  
 H 99.040444 149.497795 148.835294  
 h 103.351323 140.821567 144.243369  
 C 102.877520 141.778937 143.882439  
 O 103.521036 142.814370 143.738509  
 N 101.561049 141.625315 143.616856  
 H 101.116303 140.742043 143.880598  
 C 100.697744 142.681726 143.119284  
 H 100.512364 143.435609 143.897423  
 h 101.149665 143.212539 142.241301  
 C 99.359174 142.070534 142.692900  
 O 99.201080 140.876002 142.485832  
 N 98.376372 142.989383 142.473195  
 H 98.551555 143.956472 142.733250  
 C 97.106582 142.714110 141.808261  
 H 96.642548 143.699790 141.710072  
 h 97.264711 142.294190 140.782192  
 C 96.168253 141.817239 142.641516  
 O 95.621888 140.827768 142.170658  
 N 96.001957 142.236157 143.920469  
 H 96.522473 143.032062 144.269346  
 C 95.130658 141.576271 144.878962  
 H 95.216475 142.158588 145.798320  
 h 94.054828 141.594108 144.564055  
 C 95.559899 140.128183 145.234017  
 O 94.763112 139.195222 145.191815  
 N 96.862242 139.980268 145.637511  
 H 97.479921 140.785349 145.639900  
 C 97.376372 138.671428 146.004349  
 H 96.611252 137.977882 145.639948  
 C 98.686113 138.254077 145.291410  
 H 98.558593 138.480637 144.233028  
 H 98.775298 137.178842 145.441543  
 S 100.351988 138.874869 145.816661  
 C 97.480553 138.331244 147.506084  
 O 97.772511 137.166543 147.778680

N 97.328978 139.327396 148.415809  
H 96.954204 140.222131 148.121496  
C 97.359488 139.171256 149.875196  
H 97.222153 140.174709 150.283557  
C 96.215979 138.311761 150.407227  
H 96.299130 137.299493 150.024942  
H 96.234774 138.296207 151.508088  
O 94.988017 138.898496 149.933657  
H 94.241373 138.519206 150.485645  
h 98.340506 138.836356 150.289925  
h 98.261895 145.842051 151.493526  
C 97.923008 144.924035 152.064889  
O 97.701964 144.981478 153.271793  
N 97.779546 143.827366 151.300118  
H 97.991997 143.851401 150.304464  
C 97.400422 142.553956 151.883419  
H 97.384863 141.820565 151.080141  
H 98.143192 142.231644 152.622544  
h 96.402931 142.536563 152.368131  
h 93.584491 143.484443 152.849008  
C 92.799482 142.721869 152.649307  
H 93.121458 141.795562 153.138312  
H 91.868112 143.046060 153.129179  
O 92.535283 142.528858 151.272999  
H 93.351701 142.091560 150.946126  
h 92.894050 141.025333 148.075966  
C 93.375209 142.030230 148.167241  
H 93.374335 142.544317 147.208994  
H 92.846026 142.622660 148.911516  
C 94.764312 141.755560 148.648020  
O 95.736118 141.632033 147.934685  
O 94.763302 141.510423 149.984657  
h 93.139111 145.625479 148.921380  
C 93.999452 145.490596 148.256808  
S 95.514667 144.924151 148.994010  
C 93.991505 145.853658 146.957072  
S 95.372559 145.636563 145.860337  
h 93.143141 146.380329 146.616173  
Cu 100.065767 140.747038 146.803328  
S 98.530043 143.662640 145.987731  
Mo 97.192306 145.253347 147.351053  
O 98.514306 144.020024 148.519759  
O 97.849216 146.827847 147.470600  
C 99.075547 143.239667 147.642846  
N 99.879799 142.247813 147.930197  
H 95.154540 140.622862 150.199168  
C 100.259472 141.999126 149.329580  
H 99.368505 141.853757 149.956861  
H 100.803352 141.049554 149.335699  
C 101.145760 143.070791 149.972785  
H 101.525713 142.641705 150.916451  
H 100.526906 143.929460 150.254273  
C 102.322437 143.565415 149.132488  
H 101.946520 144.008596 148.204194  
H 102.951379 142.714485 148.831660  
C 103.168505 144.589085 149.892242  
H 103.601044 144.150391 150.803095  
H 104.000062 144.962074 149.282298  
H 102.564926 145.452014 150.200568

Optimized geometries in DFT calculations  
using Model I

====Int1A====  
H 99.292331 151.213029 146.938833  
C 98.279096 151.146451 146.487517  
O 97.721634 152.136343 146.025884  
N 97.768285 149.896975 146.512575  
H 96.847787 149.743325 146.121280  
H 98.229399 149.075401 146.898906  
H 103.152511 141.120854 144.278218  
C 102.566743 142.032590 144.065342  
O 102.928179 143.135602 144.473601  
N 101.483167 141.804263 143.296457  
H 101.181096 140.859161 143.090400  
C 100.553121 142.859149 142.956032  
H 100.367245 143.510137 143.812502  
H 100.980154 143.494649 142.172596  
C 99.260512 142.275556 142.397999  
O 99.208373 141.140173 141.926201  
N 98.228132 143.162169 142.380610  
H 98.288897 143.960870 143.006736  
C 96.955265 142.856891 141.746172  
H 96.486236 143.813433 141.483337  
H 97.176481 142.331038 140.802181  
C 95.912086 142.065999 142.602858  
O 95.163978 141.249428 142.078196  
N 95.848088 142.447189 143.912449  
H 96.518991 143.131273 144.263031  
C 94.967813 141.893179 144.942514  
H 94.914909 142.659989 145.724439  
H 93.938518 141.703712 144.606412  
C 95.466176 140.577519 145.572430  
O 94.704054 139.636572 145.783581  
N 96.791931 140.548868 145.902860  
H 97.356742 141.374331 145.717964  
C 97.510744 139.291897 146.077291  
H 97.005226 138.537508 145.461685  
C 98.964738 139.433647 145.578403  
H 98.939878 139.820593 144.553320  
H 99.386470 138.425286 145.550678  
S 100.099509 140.429391 146.649251  
C 97.526446 138.702016 147.498321  
O 97.947830 137.561880 147.683632  
N 97.065440 139.492326 148.511690  
H 96.870189 140.460268 148.283855  
C 97.452792 139.216296 149.892030  
H 97.283329 140.134878 150.455062  
C 96.641700 138.075477 150.504974  
H 96.892779 137.132844 150.007554  
H 96.861141 137.985747 151.574253  
O 95.229048 138.311451 150.404348  
H 95.073941 138.487221 149.456971  
H 98.515081 138.959904 149.933647  
H 98.013633 146.288202 151.182990  
C 97.859478 145.610255 152.041289  
O 97.660192 146.001329 153.189353  
N 97.927816 144.317089 151.647193  
H 97.981683 144.157377 150.640469

|              |            |            |            |    |            |            |            |
|--------------|------------|------------|------------|----|------------|------------|------------|
| C            | 97.544447  | 143.236851 | 152.528317 | N  | 95.886058  | 142.385825 | 143.939164 |
| H            | 98.051960  | 142.314077 | 152.230742 | H  | 96.541255  | 143.085178 | 144.283850 |
| H            | 97.826418  | 143.498857 | 153.551226 | C  | 94.970813  | 141.855588 | 144.952994 |
| H            | 96.460253  | 143.067662 | 152.496411 | H  | 94.930357  | 142.619801 | 145.738660 |
| H            | 93.563831  | 143.665626 | 152.688169 | H  | 93.938518  | 141.703712 | 144.606412 |
| C            | 93.004808  | 142.972242 | 153.336820 | C  | 95.397863  | 140.524807 | 145.604702 |
| H            | 93.735344  | 142.413154 | 153.944573 | O  | 94.568826  | 139.685127 | 145.949499 |
| H            | 92.396872  | 143.576195 | 154.019512 | N  | 96.737651  | 140.388504 | 145.819918 |
| O            | 92.117875  | 142.124170 | 152.630080 | H  | 97.342014  | 141.129036 | 145.477768 |
| H            | 92.647134  | 141.519228 | 152.080278 | C  | 97.390796  | 139.104004 | 146.040180 |
| H            | 93.039446  | 141.250071 | 148.198801 | H  | 96.804254  | 138.337655 | 145.516830 |
| C            | 93.220650  | 142.007430 | 148.976000 | C  | 98.803299  | 139.138485 | 145.423993 |
| H            | 93.595809  | 142.927801 | 148.525437 | H  | 98.708327  | 139.398852 | 144.363270 |
| H            | 92.283385  | 142.185367 | 149.510730 | H  | 99.208454  | 138.126423 | 145.496127 |
| C            | 94.251615  | 141.399104 | 149.881833 | S  | 100.036555 | 140.245484 | 146.254491 |
| O            | 93.694454  | 140.489502 | 150.733732 | C  | 97.486336  | 138.605483 | 147.494446 |
| O            | 95.446047  | 141.595823 | 149.835922 | O  | 97.916309  | 137.474616 | 147.717282 |
| H            | 93.211367  | 146.090982 | 148.920492 | N  | 97.071882  | 139.445167 | 148.483598 |
| C            | 94.080951  | 145.961025 | 148.261186 | H  | 96.834156  | 140.396423 | 148.228612 |
| S            | 95.573883  | 145.587265 | 149.112747 | C  | 97.453141  | 139.212583 | 149.873813 |
| C            | 94.042348  | 145.995888 | 146.912816 | H  | 97.280002  | 140.148258 | 150.405669 |
| S            | 95.454494  | 145.670240 | 145.920291 | C  | 96.643826  | 138.089819 | 150.522237 |
| H            | 93.145028  | 146.187599 | 146.328051 | H  | 96.889214  | 137.133564 | 150.048803 |
| Cu           | 99.730562  | 142.645198 | 146.750342 | H  | 96.874544  | 138.029250 | 151.591081 |
| S            | 98.272251  | 144.141368 | 145.680744 | O  | 95.230352  | 138.324036 | 150.431890 |
| Mo           | 97.454940  | 145.458669 | 147.488953 | H  | 95.058486  | 138.474433 | 149.483459 |
| O            | 98.233033  | 144.631169 | 148.819345 | H  | 98.515081  | 138.959904 | 149.933647 |
| O            | 98.146265  | 147.040487 | 147.366580 | H  | 98.013633  | 146.288202 | 151.182990 |
| C            | 100.894781 | 143.578519 | 147.932042 | C  | 97.862843  | 145.592925 | 152.027125 |
| O            | 101.658769 | 144.088977 | 148.613563 | O  | 97.690689  | 145.958815 | 153.188285 |
| H            | 94.396964  | 139.824571 | 150.964061 | N  | 97.901079  | 144.311980 | 151.599093 |
| O            | 101.323232 | 145.632467 | 144.725748 | H  | 97.948863  | 144.169912 | 150.588973 |
| H            | 101.871007 | 144.825585 | 144.729998 | C  | 97.547900  | 143.211843 | 152.466309 |
| H            | 100.490205 | 145.368883 | 145.155869 | H  | 98.015673  | 142.290939 | 152.105738 |
| ====         |            |            |            | H  | 97.897008  | 143.429840 | 153.479074 |
|              |            |            |            | H  | 96.460253  | 143.067662 | 152.496411 |
|              |            |            |            | H  | 93.563831  | 143.665626 | 152.688169 |
| ====TS1A==== |            |            |            | C  | 92.991658  | 142.986034 | 153.339631 |
| H            | 99.292331  | 151.213029 | 146.938833 | H  | 93.710501  | 142.431393 | 153.965399 |
| C            | 98.231803  | 151.164804 | 146.610970 | H  | 92.378622  | 143.603824 | 154.005135 |
| O            | 97.633976  | 152.168389 | 146.238602 | O  | 92.109186  | 142.133010 | 152.633425 |
| N            | 97.712976  | 149.919614 | 146.673220 | H  | 92.643721  | 141.532511 | 152.083773 |
| H            | 96.750521  | 149.782921 | 146.392177 | H  | 93.039446  | 141.250071 | 148.198801 |
| H            | 98.207547  | 149.086294 | 146.984674 | C  | 93.217462  | 142.004197 | 148.979242 |
| H            | 103.152511 | 141.120854 | 144.278218 | H  | 93.586078  | 142.927923 | 148.530076 |
| C            | 102.617728 | 142.046383 | 143.992738 | H  | 92.284524  | 142.174115 | 149.523264 |
| O            | 103.069023 | 143.159822 | 144.258075 | C  | 94.262187  | 141.391763 | 149.863975 |
| N            | 101.481361 | 141.803794 | 143.307856 | O  | 93.717568  | 140.519314 | 150.760580 |
| H            | 101.094282 | 140.866799 | 143.319028 | O  | 95.459081  | 141.549884 | 149.761257 |
| C            | 100.555998 | 142.864157 | 142.962928 | H  | 93.211367  | 146.090982 | 148.920492 |
| H            | 100.376090 | 143.531506 | 143.809885 | C  | 94.079926  | 145.933496 | 148.263226 |
| H            | 100.980154 | 143.494649 | 142.172596 | S  | 95.574545  | 145.516662 | 149.102782 |
| C            | 99.253294  | 142.276435 | 142.431561 | C  | 94.034622  | 145.978969 | 146.916691 |
| O            | 99.168236  | 141.123078 | 142.014626 | S  | 95.438686  | 145.629511 | 145.910257 |
| N            | 98.227783  | 143.173754 | 142.380389 | H  | 93.145028  | 146.187599 | 146.328051 |
| H            | 98.306200  | 144.012561 | 142.946599 | Cu | 99.318343  | 142.315979 | 146.704867 |
| C            | 96.956425  | 142.847587 | 141.754761 | S  | 98.359609  | 144.217681 | 145.709812 |
| H            | 96.467623  | 143.796604 | 141.501210 | Mo | 97.415905  | 145.450058 | 147.414339 |
| H            | 97.176481  | 142.331038 | 140.802181 | O  | 98.239306  | 144.439090 | 148.722823 |
| C            | 95.929075  | 142.038440 | 142.615706 | O  | 98.130292  | 147.018531 | 147.394008 |
| O            | 95.169245  | 141.234950 | 142.089846 |    |            |            |            |

C 99.612307 143.328960 148.413665  
O 100.405451 143.332502 149.266446  
H 94.415996 139.848480 150.985019  
O 101.435971 145.628844 144.592323  
H 102.021485 144.848451 144.587386  
H 100.697866 145.380971 145.175193

====

====Int2A====

H 99.292333 151.213027 146.938830  
C 98.248161 151.053799 146.591373  
O 97.571287 151.983722 146.168823  
N 97.841857 149.768880 146.690765  
H 96.903490 149.528805 146.397014  
H 98.403940 148.999219 147.041464  
H 103.152517 141.120777 144.278308  
C 102.642944 142.050777 143.940563  
O 103.164130 143.158102 144.076794  
N 101.451206 141.809296 143.353663  
H 101.013897 140.912158 143.548447  
C 100.541764 142.876328 142.968084  
H 100.345103 143.562839 143.797171  
H 100.980108 143.494752 142.172439  
C 99.245619 142.288330 142.414918  
O 99.168600 141.151524 141.958409  
N 98.206836 143.175331 142.390740  
H 98.277645 144.005356 142.968220  
C 96.942866 142.846549 141.752345  
H 96.451417 143.792557 141.492450  
H 97.176530 142.331043 140.802261  
C 95.902585 142.037819 142.599287  
O 95.097426 141.296657 142.049125  
N 95.903257 142.322349 143.937338  
H 96.604958 142.965764 144.300384  
C 94.975422 141.815347 144.950966  
H 94.962064 142.575349 145.742167  
H 93.938525 141.703690 144.606422  
C 95.361121 140.470972 145.602906  
O 94.507044 139.670707 145.978705  
N 96.699689 140.285463 145.788184  
H 97.317158 140.994581 145.406759  
C 97.319332 138.990634 146.039422  
H 96.684820 138.223340 145.576607  
C 98.698522 138.945174 145.356158  
H 98.555808 139.120470 144.283851  
H 99.093637 137.936685 145.494647  
S 99.998449 140.109214 145.992740  
C 97.464394 138.545445 147.509741  
O 97.911770 137.425288 147.753902  
N 97.063664 139.408763 148.480818  
H 96.806530 140.349577 148.208301  
C 97.456440 139.218580 149.875386  
H 97.306704 140.175197 150.373816  
C 96.646173 138.122868 150.565257  
H 96.879218 137.149592 150.120238  
H 96.888179 138.093275 151.632869  
O 95.232019 138.361414 150.484092  
H 95.051067 138.490336 149.534312  
H 98.515071 138.959904 149.933637  
H 98.013636 146.288188 151.182992

C 97.843095 145.628446 152.052367  
O 97.619374 146.044840 153.186722  
N 97.929025 144.330839 151.685735  
H 98.003652 144.134364 150.689253  
C 97.540283 143.252615 152.566504  
H 98.076278 142.342846 152.282553  
H 97.784204 143.527245 153.595650  
H 96.460250 143.067666 152.496414  
H 93.563832 143.665628 152.688170  
C 92.971665 143.002299 153.338233  
H 93.672441 142.450491 153.986998  
H 92.351432 143.636126 153.981693  
O 92.096309 142.146880 152.626808  
H 92.638849 141.553815 152.076505  
H 93.039446 141.250069 148.198800  
C 93.213444 142.011659 148.972278  
H 93.566143 142.935805 148.511645  
H 92.285619 142.173785 149.526760  
C 94.278781 141.414012 149.841166  
O 93.756667 140.579260 150.785050  
O 95.472885 141.547572 149.684898  
H 93.211403 146.090961 148.920484  
C 94.071653 145.905481 148.262684  
S 95.551729 145.429430 149.109080  
C 94.035108 145.973070 146.918094  
S 95.455428 145.613609 145.918415  
H 93.144983 146.187625 146.328043  
Cu 99.184005 142.059469 146.779764  
S 98.292691 143.927984 145.841571  
Mo 97.338664 145.323460 147.428218  
O 98.171939 144.011799 148.748089  
O 98.220810 146.791627 147.474093  
C 98.860150 142.897523 148.573864  
O 99.273721 142.176746 149.459000  
H 94.453705 139.905432 151.006780  
O 101.417786 145.488125 144.846728  
H 102.036206 144.749007 144.696048  
H 100.719040 145.123659 145.416480

====

====TS2A====

H 99.292332 151.213032 146.938835  
C 98.192082 151.316174 146.828645  
O 97.669347 152.406898 146.623349  
N 97.540712 150.140407 146.946288  
H 96.532975 150.139750 146.855931  
H 97.979578 149.234468 147.116281  
H 103.152502 141.120925 144.278187  
C 102.635817 142.048617 143.969068  
O 103.121755 143.159079 144.176498  
N 101.473814 141.808695 143.327950  
H 101.082563 140.873682 143.336310  
C 100.558349 142.872340 142.970718  
H 100.385411 143.547786 143.812456  
H 100.980176 143.494529 142.172641  
C 99.246062 142.281565 142.472399  
O 99.134160 141.106172 142.128589  
N 98.233305 143.188465 142.376779  
H 98.344643 144.077806 142.850672  
C 96.961868 142.848829 141.757912



H 96.462706 143.793172 141.508369  
H 97.176472 142.331098 140.802157  
C 95.955080 142.027243 142.631312  
O 95.228870 141.184285 142.122180  
N 95.887679 142.398536 143.949481  
H 96.490960 143.147299 144.277676  
C 94.970684 141.851959 144.955473  
H 94.930984 142.603641 145.752863  
H 93.938510 141.703691 144.606410  
C 95.390643 140.506072 145.583488  
O 94.560719 139.644987 145.864212  
N 96.721228 140.384544 145.854365  
H 97.326500 141.148677 145.568232  
C 97.389569 139.110097 146.083585  
H 96.849714 138.340029 145.518346  
C 98.835697 139.188153 145.549577  
H 98.799750 139.465341 144.490121  
H 99.261012 138.184946 145.630848  
S 99.983471 140.305777 146.485696  
C 97.437359 138.592559 147.533064  
O 97.848641 137.454494 147.753575  
N 97.029315 139.435161 148.523145  
H 96.824006 140.392579 148.262801  
C 97.451646 139.216011 149.904645  
H 97.298208 140.159357 150.429646  
C 96.655619 138.106608 150.590732  
H 96.887972 137.141454 150.128787  
H 96.909781 138.063973 151.655079  
O 95.241301 138.343617 150.527142  
H 95.048840 138.465313 149.578736  
H 98.515079 138.959906 149.933655  
H 98.013632 146.288206 151.183004  
C 97.857125 145.576349 152.012961  
O 97.665425 145.921985 153.175721  
N 97.915448 144.294543 151.578479  
H 97.971820 144.147720 150.574525  
C 97.550510 143.189434 152.438449  
H 97.987322 142.264389 152.051685  
H 97.929903 143.381326 153.445551  
H 96.460253 143.067664 152.496421  
H 93.563831 143.665626 152.688169  
C 92.960864 143.003305 153.329357  
H 93.650743 142.443598 153.983009  
H 92.338635 143.638720 153.969089  
O 92.085900 142.157020 152.605998  
H 92.627219 141.555043 152.064755  
H 93.039449 141.250072 148.198804  
C 93.228553 142.017071 148.964988  
H 93.595044 142.933745 148.499312  
H 92.299389 142.199648 149.511736  
C 94.275413 141.421823 149.860323  
O 93.731663 140.554383 150.762365  
O 95.471721 141.591547 149.767064  
H 93.211413 146.090956 148.920478  
C 94.080368 145.935953 148.261124  
S 95.615120 145.582797 149.095205  
C 94.034697 145.992873 146.917253  
S 95.474997 145.733555 145.904733  
H 93.144986 146.187621 146.328040  
Cu 99.273949 142.392144 146.420490

S 98.651844 144.417658 145.817845  
Mo 97.341684 145.697524 147.391148  
O 98.501332 144.376442 148.611368  
O 98.041550 147.261069 147.428544  
C 99.564196 143.933071 148.050592  
O 100.709709 143.788336 148.362653  
H 94.434908 139.898962 151.014095  
O 101.583310 145.700062 144.176121  
H 102.161202 144.918633 144.265932  
H 100.907381 145.574782 144.864319

====

====Int3A====

H 99.292350 151.213062 146.938839  
C 98.193157 151.314487 146.815926  
O 97.672104 152.405795 146.609185  
N 97.540514 150.137904 146.918234  
H 96.533085 150.140636 146.824476  
H 97.973440 149.230092 147.093097  
H 103.152531 141.120856 144.278214  
C 102.657834 142.048637 143.909988  
O 103.221129 143.143042 143.965492  
N 101.433108 141.819867 143.389890  
H 100.983862 140.930231 143.611167  
C 100.541052 142.894592 142.982539  
H 100.369270 143.607692 143.795715  
H 100.980145 143.494636 142.172622  
C 99.229931 142.310636 142.464381  
O 99.113454 141.152576 142.080338  
N 98.196007 143.205706 142.403855  
H 98.330375 144.142224 142.762677  
C 96.942140 142.843078 141.759931  
H 96.420330 143.775650 141.512770  
H 97.176470 142.331039 140.802158  
C 95.951955 141.996317 142.630919  
O 95.221409 141.161366 142.117503  
N 95.914722 142.329225 143.964016  
H 96.465654 143.123131 144.271028  
C 94.970265 141.819988 144.965141  
H 94.939707 142.584126 145.751346  
H 93.938515 141.703700 144.606420  
C 95.324132 140.477606 145.636495  
O 94.444626 139.770409 146.126703  
N 96.650841 140.187662 145.707085  
H 97.282621 140.820848 145.224615  
C 97.191957 138.864833 145.994614  
H 96.471213 138.125604 145.619998  
C 98.512111 138.678550 145.222794  
H 98.312158 138.820118 144.155132  
H 98.838732 137.649348 145.385623  
S 99.926372 139.757674 145.744597  
C 97.401744 138.481993 147.477203  
O 97.797185 137.347667 147.745754  
N 97.096167 139.402786 148.428622  
H 96.853949 140.341065 148.134954  
C 97.458456 139.221138 149.832793  
H 97.289986 140.181318 150.320078  
C 96.631563 138.135501 150.520824  
H 96.856125 137.159133 150.080062  
H 96.871485 138.108962 151.588987

O 95.221851 138.391021 150.437717  
H 95.033961 138.512232 149.488528  
H 98.515081 138.959897 149.933655  
H 98.013632 146.288206 151.182992  
C 97.808920 145.686772 152.085162  
O 97.499942 146.165469 153.174186  
N 97.954110 144.370023 151.807234  
H 98.109004 144.148223 150.824356  
C 97.499216 143.345082 152.716592  
H 98.129553 142.452908 152.635289  
H 97.549132 143.739040 153.734465  
H 96.460253 143.067654 152.496412  
H 93.563831 143.665629 152.688165  
C 92.942309 143.011411 153.319439  
H 93.613875 142.457048 153.996654  
H 92.304445 143.654111 153.936136  
O 92.086529 142.159044 152.580847  
H 92.644713 141.573580 152.038246  
H 93.039447 141.250071 148.198806  
C 93.232479 142.036400 148.943368  
H 93.573524 142.947675 148.449019  
H 92.318984 142.216205 149.516060  
C 94.312746 141.455425 149.804161  
O 93.801022 140.633518 150.765135  
O 95.505512 141.584579 149.630329  
H 93.211404 146.090943 148.920476  
C 94.074084 145.935561 148.262288  
S 95.592504 145.654818 149.148140  
C 94.034941 145.939629 146.916301  
S 95.504636 145.559677 145.954027  
H 93.144974 146.187633 146.328042  
Cu 99.268096 141.819838 146.091458  
S 98.985260 143.989864 146.533043  
Mo 97.330101 145.666845 147.516613  
O 98.457067 144.574065 148.975990  
O 97.990880 147.239224 147.374188  
C 99.308791 143.792494 148.373896  
O 100.130219 143.043389 148.851755  
H 94.490224 139.949591 150.976093  
O 101.526539 145.514650 144.549041  
H 102.181434 144.801203 144.421167  
H 101.031337 145.250036 145.343326

====

====TS3A====

H 99.292352 151.213067 146.938839  
C 98.197803 151.322253 146.785410  
O 97.691059 152.415051 146.552110  
N 97.534865 150.151526 146.884995  
H 96.530654 150.158414 146.761532  
H 97.959997 149.243550 147.080712  
H 103.152533 141.120856 144.278215  
C 102.649193 142.049383 143.922251  
O 103.208440 143.146119 143.986266  
N 101.423423 141.822116 143.405096  
H 100.974502 140.929355 143.619079  
C 100.537152 142.898725 142.987337  
H 100.363275 143.614079 143.797536  
H 100.980143 143.494632 142.172623  
C 99.223762 142.314462 142.473948

O 99.103063 141.152773 142.102959  
N 98.191896 143.211609 142.404658  
H 98.328968 144.151233 142.754053  
C 96.940464 142.851110 141.754434  
H 96.425763 143.784658 141.496648  
H 97.176464 142.331044 140.802156  
C 95.934686 142.018001 142.619197  
O 95.174943 141.216646 142.093517  
N 95.914314 142.331267 143.955340  
H 96.521979 143.075364 144.279642  
C 94.975545 141.822305 144.960983  
H 94.945604 142.586435 145.747367  
H 93.938545 141.703684 144.606426  
C 95.344392 140.483263 145.634219  
O 94.471432 139.780215 146.142578  
N 96.672055 140.184168 145.686172  
H 97.308434 140.803878 145.193203  
C 97.187681 138.847731 145.971893  
H 96.441297 138.128468 145.608837  
C 98.491305 138.613804 145.183766  
H 98.286172 138.794784 144.122710  
H 98.756648 137.562052 145.312653  
S 99.978503 139.586927 145.712285  
C 97.393006 138.463925 147.455432  
O 97.749709 137.317982 147.727679  
N 97.116180 139.398397 148.403613  
H 96.904962 140.341873 148.103555  
C 97.459737 139.217256 149.812461  
H 97.282157 140.178229 150.294932  
C 96.623782 138.132723 150.490913  
H 96.852185 137.155734 150.054325  
H 96.850038 138.108212 151.562196  
O 95.215555 138.390545 150.389413  
H 95.041577 138.520902 149.438578  
H 98.515080 138.959889 149.933655  
H 98.013637 146.288199 151.182990  
C 97.828494 145.624466 152.046674  
O 97.560916 146.034474 153.173982  
N 97.945538 144.325278 151.686768  
H 98.075170 144.139378 150.692723  
C 97.540267 143.255217 152.569917  
H 98.075528 142.336582 152.310548  
H 97.772527 143.538270 153.599827  
H 96.460251 143.067653 152.496413  
H 93.563830 143.665633 152.688166  
C 92.948078 143.001389 153.314792  
H 93.624778 142.446350 153.986277  
H 92.306681 143.634322 153.937998  
O 92.097246 142.149299 152.570518  
H 92.658403 141.567538 152.026782  
H 93.039444 141.250073 148.198805  
C 93.239368 142.041723 148.935867  
H 93.579494 142.949017 148.433775  
H 92.330162 142.227254 149.513665  
C 94.323003 141.461448 149.792895  
O 93.812869 140.633988 150.750250  
O 95.515050 141.594778 149.618385  
H 93.211417 146.090942 148.920479  
C 94.079634 145.961330 148.262203  
S 95.611408 145.683075 149.129496

C 94.037916 145.980255 146.917201  
S 95.500949 145.664618 145.935062  
H 93.144938 146.187656 146.328034  
Cu 99.399834 141.596889 146.376875  
S 98.746866 143.951447 146.309832  
Mo 97.327386 145.722421 147.475279  
O 98.466733 144.458336 148.826795  
O 98.030999 147.282095 147.392228  
C 99.057066 143.590700 148.075884  
O 99.676176 142.576722 148.413936  
H 94.496655 139.939651 150.946111  
O 101.519174 145.511247 144.613210  
H 102.161651 144.788198 144.476356  
H 100.974153 145.218099 145.363047

====

====Int4A====

H 99.292352 151.213067 146.938839  
C 98.197803 151.322253 146.785410  
O 97.691059 152.415051 146.552110  
N 97.534865 150.151526 146.884995  
H 96.530654 150.158414 146.761532  
H 97.959997 149.243550 147.080712  
H 103.152533 141.120856 144.278215  
C 102.649193 142.049383 143.922251  
O 103.208440 143.146119 143.986266  
N 101.423423 141.822116 143.405096  
H 100.974502 140.929355 143.619079  
C 100.537152 142.898725 142.987337  
H 100.363275 143.614079 143.797536  
H 100.980143 143.494632 142.172623  
C 99.223762 142.314462 142.473948  
O 99.103063 141.152773 142.102959  
N 98.191896 143.211609 142.404658  
H 98.328968 144.151233 142.754053  
C 96.940464 142.851110 141.754434  
H 96.425763 143.784658 141.496648  
H 97.176464 142.331044 140.802156  
C 95.934686 142.018001 142.619197  
O 95.174943 141.216646 142.093517  
N 95.914314 142.331267 143.955340  
H 96.521979 143.075364 144.279642  
C 94.975545 141.822305 144.960983  
H 94.945604 142.586435 145.747367  
H 93.938545 141.703684 144.606426  
C 95.344392 140.483263 145.634219  
O 94.471432 139.780215 146.142578  
N 96.672055 140.184168 145.686172  
H 97.308434 140.803878 145.193203  
C 97.187681 138.847731 145.971893  
H 96.441297 138.128468 145.608837  
C 98.491305 138.613804 145.183766  
H 98.286172 138.794784 144.122710  
H 98.756648 137.562052 145.312653  
S 99.978503 139.586927 145.712285  
C 97.393006 138.463925 147.455432  
O 97.749709 137.317982 147.727679  
N 97.116180 139.398397 148.403613  
H 96.904962 140.341873 148.103555  
C 97.459737 139.217256 149.812461

H 97.282157 140.178229 150.294932  
C 96.623782 138.132723 150.490913  
H 96.852185 137.155734 150.054325  
H 96.850038 138.108212 151.562196  
O 95.215555 138.390545 150.389413  
H 95.041577 138.520902 149.438578  
H 98.515080 138.959889 149.933655  
H 98.013637 146.288199 151.182990  
C 97.828494 145.624466 152.046674  
O 97.560916 146.034474 153.173982  
N 97.945538 144.325278 151.686768  
H 98.075170 144.139378 150.692723  
C 97.540267 143.255217 152.569917  
H 98.075528 142.336582 152.310548  
H 97.772527 143.538270 153.599827  
H 96.460251 143.067653 152.496413  
H 93.563830 143.665633 152.688166  
C 92.948078 143.001389 153.314792  
H 93.624778 142.446350 153.986277  
H 92.306681 143.634322 153.937998  
O 92.097246 142.149299 152.570518  
H 92.658403 141.567538 152.026782  
H 93.039444 141.250073 148.198805  
C 93.239368 142.041723 148.935867  
H 93.579494 142.949017 148.433775  
H 92.330162 142.227254 149.513665  
C 94.323003 141.461448 149.792895  
O 93.812869 140.633988 150.750250  
O 95.515050 141.594778 149.618385  
H 93.211417 146.090942 148.920479  
C 94.079634 145.961330 148.262203  
S 95.611408 145.683075 149.129496  
C 94.037916 145.980255 146.917201  
S 95.500949 145.664618 145.935062  
H 93.144938 146.187656 146.328034  
Cu 99.399834 141.596889 146.376875  
S 98.746866 143.951447 146.309832  
Mo 97.327386 145.722421 147.475279  
O 98.466733 144.458336 148.826795  
O 98.030999 147.282095 147.392228  
C 99.057066 143.590700 148.075884  
O 99.676176 142.576722 148.413936  
H 94.496655 139.939651 150.946111  
O 101.519174 145.511247 144.613210  
H 102.161651 144.788198 144.476356  
H 100.974153 145.218099 145.363047

====

====TS4A====

H 99.292333 151.213034 146.938834  
C 98.232170 151.468286 147.146031  
O 97.853828 152.632462 147.231310  
N 97.456779 150.373390 147.284564  
H 96.472674 150.505700 147.477686  
H 97.790865 149.409412 147.209399  
H 103.152519 141.120858 144.278215  
C 102.622109 142.043937 143.978095  
O 103.078329 143.158731 144.225127  
N 101.481291 141.795970 143.302846  
H 101.112280 140.852862 143.271801

C 100.555533 142.853968 142.953441  
 H 100.362879 143.507475 143.807551  
 H 100.980152 143.494638 142.172607  
 C 99.259200 142.266966 142.412042  
 O 99.185384 141.123432 141.964331  
 N 98.228990 143.158848 142.390770  
 H 98.297472 143.966141 143.006674  
 C 96.957901 142.837399 141.763830  
 H 96.465546 143.787958 141.522055  
 H 97.176479 142.331043 140.802169  
 C 95.938121 142.021945 142.627515  
 O 95.177013 141.215719 142.107911  
 N 95.900714 142.362439 143.955338  
 H 96.542763 143.074699 144.298577  
 C 94.973574 141.828618 144.957707  
 H 94.949890 142.576670 145.759720  
 H 93.938511 141.703712 144.606414  
 C 95.365522 140.472721 145.586704  
 O 94.515408 139.640648 145.896716  
 N 96.696673 140.316391 145.826928  
 H 97.315806 141.068212 145.532753  
 C 97.349761 139.041292 146.084987  
 H 96.811130 138.262172 145.531083  
 C 98.803483 139.104921 145.564200  
 H 98.777339 139.342446 144.494699  
 H 99.232543 138.107296 145.686134  
 S 99.927773 140.272469 146.468651  
 C 97.387880 138.550966 147.544312  
 O 97.760293 137.404228 147.787567  
 N 97.019835 139.429579 148.520622  
 H 96.865063 140.389270 148.234294  
 C 97.453653 139.228772 149.901757  
 H 97.313897 140.183022 150.411547  
 C 96.650437 138.141295 150.614192  
 H 96.872810 137.164567 150.173013  
 H 96.906434 138.120648 151.678756  
 O 95.238291 138.389459 150.547721  
 H 95.043797 138.487427 149.596756  
 H 98.515081 138.959904 149.933653  
 H 98.013634 146.288204 151.183001  
 C 98.072488 145.512287 151.962371  
 O 98.368123 145.742998 153.130559  
 N 97.785478 144.289363 151.447349  
 H 97.378552 144.275408 150.518463  
 C 97.533807 143.150826 152.301992  
 H 97.882944 142.228463 151.828617  
 H 98.060059 143.309574 153.244933  
 H 96.460250 143.067661 152.496421  
 H 93.563831 143.665626 152.688169  
 C 92.958975 142.991815 153.316463  
 H 93.647676 142.418518 153.959679  
 H 92.338179 143.616666 153.967979  
 O 92.083697 142.162749 152.576249  
 H 92.624889 141.565475 152.029168  
 H 93.039446 141.250071 148.198801  
 C 93.240540 142.044019 148.933917  
 H 93.596276 142.945375 148.431700  
 H 92.318170 142.243322 149.486927  
 C 94.296850 141.480908 149.839580  
 O 93.762228 140.607438 150.740393

O 95.490245 141.681307 149.759885  
 H 93.211417 146.090955 148.920478  
 C 94.089772 145.980066 148.256302  
 S 95.686454 145.760453 149.052042  
 C 94.038238 146.023330 146.913181  
 S 95.460481 145.803471 145.868164  
 H 93.144980 146.187621 146.328040  
 Cu 99.170445 142.327275 146.253422  
 S 98.557128 144.374730 145.762620  
 Mo 97.334023 145.890413 147.295336  
 O 98.980935 144.978536 148.628650  
 O 97.935725 147.491203 147.188747  
 C 99.989475 144.559607 148.121450  
 O 101.115187 144.255400 148.019145  
 H 94.465934 139.951957 150.994199  
 O 101.500575 145.707219 144.251599  
 H 102.071886 144.922636 144.348097  
 H 100.734738 145.512793 144.821236  
 =====

====Int5A====

H 1.867877 7.935759 -0.156112  
 C 0.806899 8.032563 -0.469659  
 O 0.341974 9.111151 -0.827797  
 N 0.135097 6.865845 -0.404922  
 H -0.838976 6.860375 -0.678683  
 H 0.528319 5.967691 -0.109500  
 H 5.728017 -2.156423 -2.816769  
 C 5.218424 -1.216719 -3.129047  
 O 5.744518 -0.113422 -2.984686  
 N 4.019270 -1.446317 -3.706302  
 H 3.574155 -2.344448 -3.530320  
 C 3.122986 -0.369827 -4.095914  
 H 2.973006 0.354000 -3.284710  
 H 3.555702 0.217327 -4.922424  
 C 1.800912 -0.959561 -4.576014  
 O 1.661456 -2.140790 -4.878880  
 N 0.783627 -0.053425 -4.698505  
 H 0.925535 0.891906 -4.365689  
 C -0.471975 -0.423723 -5.336325  
 H -0.990520 0.508461 -5.591741  
 H -0.247983 -0.946231 -6.292746  
 C -1.466087 -1.258075 -4.458575  
 O -2.191727 -2.101377 -4.966392  
 N -1.521163 -0.902397 -3.133030  
 H -0.951007 -0.124220 -2.819349  
 C -2.454531 -1.430035 -2.130655  
 H -2.497732 -0.669486 -1.341757  
 H -3.485831 -1.573581 -2.488631  
 C -2.069712 -2.768078 -1.464461  
 O -2.937431 -3.514642 -1.012836  
 N -0.736922 -3.012679 -1.358340  
 H -0.105145 -2.342057 -1.785661  
 C -0.163983 -4.322979 -1.076108  
 H -0.819208 -5.078507 -1.529062  
 C 1.220618 -4.421608 -1.744194  
 H 1.098241 -4.228639 -2.815898  
 H 1.570145 -5.448039 -1.612240  
 S 2.549461 -3.323161 -1.058919  
 C -0.042294 -4.749295 0.401450

|               |            |            |            |   |            |            |            |
|---------------|------------|------------|------------|---|------------|------------|------------|
| O             | 0.306335   | -5.901052  | 0.659524   | C | 102.741569 | 141.946535 | 143.632571 |
| N             | -0.346936  | -3.836811  | 1.363848   | O | 103.469546 | 142.782117 | 143.108736 |
| H             | -0.511133  | -2.879804  | 1.073497   | N | 101.390957 | 141.869317 | 143.515295 |
| C             | 0.033469   | -4.044224  | 2.759942   | H | 100.932703 | 141.184329 | 144.118729 |
| H             | -0.121397  | -3.090723  | 3.264838   | C | 100.517960 | 142.907598 | 142.979239 |
| C             | -0.796447  | -5.132519  | 3.441571   | H | 100.246345 | 143.619761 | 143.768940 |
| H             | -0.564303  | -6.108014  | 3.003564   | H | 100.980146 | 143.494656 | 142.172562 |
| H             | -0.568383  | -5.156689  | 4.512454   | C | 99.252455  | 142.312699 | 142.351144 |
| O             | -2.205764  | -4.882476  | 3.339925   | O | 99.225590  | 141.231646 | 141.772727 |
| H             | -2.375116  | -4.746372  | 2.388881   | N | 98.186672  | 143.170970 | 142.399058 |
| H             | 1.090735   | -4.317217  | 2.838696   | H | 98.195936  | 143.878081 | 143.132794 |
| H             | 0.589254   | 3.010649   | 4.087861   | C | 96.929140  | 142.835723 | 141.756517 |
| C             | 0.590183   | 2.222765   | 4.859177   | H | 96.422126  | 143.776150 | 141.502263 |
| O             | 0.775843   | 2.444218   | 6.051475   | H | 97.176495  | 142.331028 | 140.802173 |
| N             | 0.381808   | 0.993395   | 4.315341   | C | 95.899258  | 142.017383 | 142.606144 |
| H             | 0.047896   | 0.969236   | 3.355536   | O | 95.080276  | 141.283705 | 142.063818 |
| C             | 0.103219   | -0.156769  | 5.152204   | N | 95.920707  | 142.281976 | 143.950424 |
| H             | 0.396063   | -1.070823  | 4.631197   | H | 96.620540  | 142.929140 | 144.325918 |
| H             | 0.674207   | -0.056195  | 6.077636   | C | 94.980461  | 141.779499 | 144.951806 |
| H             | -0.964421  | -0.209724  | 5.401463   | H | 94.985250  | 142.528915 | 145.753769 |
| H             | -3.860621  | 0.388336   | 5.593180   | H | 93.938481  | 141.703738 | 144.606425 |
| C             | -4.315169  | -0.337038  | 6.287175   | C | 95.332959  | 140.418107 | 145.596078 |
| H             | -3.498243  | -0.876576  | 6.794921   | O | 94.461499  | 139.645677 | 145.992409 |
| H             | -4.862138  | 0.230767   | 7.048138   | N | 96.668458  | 140.191477 | 145.762997 |
| O             | -5.243469  | -1.205985  | 5.666630   | H | 97.300281  | 140.896504 | 145.391114 |
| H             | -4.755029  | -1.759799  | 5.031066   | C | 97.268927  | 138.893075 | 146.040642 |
| H             | -4.385010  | -2.027212  | 1.103812   | H | 96.651299  | 138.123908 | 145.559260 |
| C             | -4.204851  | -1.243033  | 1.854048   | C | 98.682995  | 138.832149 | 145.421626 |
| H             | -3.848506  | -0.331107  | 1.371445   | H | 98.600365  | 139.032504 | 144.348185 |
| H             | -5.136479  | -1.062363  | 2.397374   | H | 99.048972  | 137.811771 | 145.555456 |
| C             | -3.153297  | -1.820902  | 2.754160   | S | 99.971498  | 139.946255 | 146.169492 |
| O             | -3.693285  | -2.688982  | 3.658988   | C | 97.367257  | 138.458211 | 147.517892 |
| O             | -1.957984  | -1.645145  | 2.659337   | O | 97.728275  | 137.314434 | 147.791017 |
| H             | -4.212802  | 2.814047   | 1.825498   | N | 97.045857  | 139.377796 | 148.469896 |
| C             | -3.341704  | 2.686178   | 1.162527   | H | 96.863024  | 140.320690 | 148.150878 |
| S             | -1.762936  | 2.445608   | 1.990307   | C | 97.455345  | 139.216367 | 149.862818 |
| C             | -3.387521  | 2.722512   | -0.178132  | H | 97.311068  | 140.185408 | 150.342737 |
| S             | -1.909340  | 2.522210   | -1.181788  | C | 96.642001  | 138.152875 | 150.594424 |
| H             | -4.279683  | 2.910020   | -0.766932  | H | 96.834027  | 137.167091 | 150.160430 |
| Cu            | 1.777478   | -1.332973  | -0.514279  | H | 96.912270  | 138.137444 | 151.655378 |
| S             | 1.417523   | 0.756898   | 0.021778   | O | 95.234498  | 138.437295 | 150.549436 |
| Mo            | -0.071552  | 2.505668   | 0.302837   | H | 95.003555  | 138.458304 | 149.602306 |
| O             | 3.664725   | 1.360921   | 3.003676   | H | 98.515123  | 138.959976 | 149.933639 |
| O             | 0.626129   | 4.081486   | 0.308147   | H | 98.013574  | 146.288213 | 151.183050 |
| C             | 3.232773   | 0.275432   | 3.044066   | C | 97.847043  | 145.609727 | 152.038235 |
| O             | 2.851792   | -0.829038  | 3.122589   | O | 97.605251  | 145.998649 | 153.176018 |
| H             | -2.995465  | -3.361183  | 3.882610   | N | 97.960328  | 144.308473 | 151.664807 |
| O             | 3.715884   | 2.107150   | -2.218149  | H | 98.032678  | 144.115457 | 150.669754 |
| H             | 4.466765   | 1.486634   | -2.254636  | C | 97.546818  | 143.234559 | 152.545472 |
| H             | 3.191013   | 1.833020   | -1.440434  | H | 98.061494  | 142.310075 | 152.266572 |
| ====          |            |            |            | H | 97.806922  | 143.503180 | 153.571933 |
| ====Int6A==== |            |            |            | H | 96.460161  | 143.067544 | 152.496276 |
| H             | 99.292328  | 151.213010 | 146.938832 | H | 93.563853  | 143.665734 | 152.688170 |
| C             | 98.295133  | 151.032094 | 146.479038 | C | 92.812068  | 143.038190 | 153.191570 |
| O             | 97.689324  | 151.937261 | 145.916026 | H | 93.325851  | 142.448199 | 153.969648 |
| N             | 97.860444  | 149.760495 | 146.612807 | H | 92.104252  | 143.706523 | 153.693461 |
| H             | 96.962992  | 149.509280 | 146.216965 | O | 92.062858  | 142.230357 | 152.302193 |
| H             | 98.355878  | 149.003470 | 147.078194 | H | 92.683292  | 141.643886 | 151.834894 |
| H             | 103.152515 | 141.120839 | 144.278218 | H | 93.039476  | 141.250044 | 148.198884 |
|               |            |            |            | C | 93.348405  | 142.111724 | 148.812723 |

|    |            |            |            |
|----|------------|------------|------------|
| H  | 93.679167  | 142.943609 | 148.190619 |
| H  | 92.500091  | 142.408844 | 149.436702 |
| C  | 94.460996  | 141.590858 | 149.669075 |
| O  | 93.982469  | 140.771397 | 150.635999 |
| O  | 95.656064  | 141.773591 | 149.508469 |
| H  | 93.211364  | 146.090944 | 148.920488 |
| C  | 94.063829  | 145.928275 | 148.262793 |
| S  | 95.547584  | 145.494738 | 149.134280 |
| C  | 94.042054  | 146.012840 | 146.921015 |
| S  | 95.501483  | 145.730948 | 145.935118 |
| H  | 93.145116  | 146.187601 | 146.328084 |
| Cu | 99.183512  | 142.012374 | 146.186645 |
| S  | 98.339383  | 143.970782 | 145.764783 |
| Mo | 97.289101  | 145.425542 | 147.471325 |
| O  | 100.290066 | 141.095354 | 149.861460 |
| O  | 98.203453  | 146.871057 | 147.618800 |
| C  | 101.214319 | 141.265236 | 149.161979 |
| O  | 102.170576 | 141.445967 | 148.515172 |
| H  | 94.662255  | 140.084626 | 150.876890 |
| O  | 97.844026  | 143.610020 | 148.715494 |
| H  | 98.344668  | 143.055575 | 148.056032 |
| H  | 97.007050  | 143.130105 | 148.911510 |

Geometries obtained by DFT calculations on model II without any constraints

====Int1A====

|    |           |           |           |
|----|-----------|-----------|-----------|
| Mo | -0.486936 | 1.530176  | -0.064401 |
| O  | -0.082116 | 1.994882  | 1.564211  |
| O  | -1.008732 | 2.913445  | -0.958714 |
| S  | 1.637006  | 1.069464  | -0.988794 |
| S  | -1.043640 | -0.623802 | -1.320266 |
| S  | -2.714766 | 0.837940  | 0.971696  |
| C  | -3.445496 | -0.446870 | -0.009076 |
| C  | -2.728601 | -1.078800 | -0.966895 |
| C  | -3.225272 | -2.227699 | -1.816221 |
| H  | -2.559720 | -3.097069 | -1.715825 |
| H  | -3.225245 | -1.960140 | -2.883125 |
| H  | -4.239524 | -2.550561 | -1.553052 |
| C  | -4.873824 | -0.762016 | 0.376707  |
| H  | -5.289805 | -1.607468 | -0.183078 |
| H  | -5.528941 | 0.105565  | 0.208056  |
| H  | -4.946275 | -1.001722 | 1.447819  |
| Cu | 2.662224  | -0.555342 | 0.257511  |
| S  | 4.907812  | -0.874268 | 0.063550  |
| C  | 5.418200  | 0.376165  | -1.194876 |
| H  | 5.053651  | 1.372120  | -0.926378 |
| H  | 5.016914  | 0.127157  | -2.183087 |
| H  | 6.514479  | 0.407288  | -1.262081 |
| C  | 1.684405  | -1.637648 | 1.406486  |
| O  | 1.111356  | -2.339519 | 2.117039  |

====

====TS1A====

|    |           |           |           |
|----|-----------|-----------|-----------|
| Mo | -0.501874 | -0.680639 | 0.691951  |
| O  | 0.496303  | -1.598378 | -0.525023 |
| O  | -0.924393 | -1.739997 | 1.981982  |
| S  | 1.201659  | 0.633359  | 1.448541  |
| S  | -1.984406 | 1.347005  | 0.973764  |
| S  | -2.289730 | -1.092022 | -1.067649 |

|    |           |           |           |
|----|-----------|-----------|-----------|
| C  | -3.646784 | 0.005047  | -0.741927 |
| C  | -3.515826 | 1.041326  | 0.119222  |
| C  | -4.582450 | 2.068781  | 0.426091  |
| H  | -4.209245 | 3.084290  | 0.228603  |
| H  | -4.863160 | 2.043639  | 1.489345  |
| H  | -5.496301 | 1.928275  | -0.162755 |
| C  | -4.889724 | -0.317031 | -1.541940 |
| H  | -5.693416 | 0.414639  | -1.399744 |
| H  | -5.286872 | -1.306658 | -1.272087 |
| H  | -4.659955 | -0.358029 | -2.616632 |
| Cu | 2.926064  | 0.321547  | -0.158046 |
| S  | 4.616335  | 1.623402  | -0.852569 |
| C  | 4.204774  | 3.288702  | -0.160441 |
| H  | 4.149661  | 3.264370  | 0.933137  |
| H  | 3.243636  | 3.650773  | -0.539534 |
| H  | 4.983492  | 4.007312  | -0.451082 |
| C  | 2.369650  | -1.546344 | -0.532423 |
| O  | 2.821948  | -2.599104 | -0.745377 |

====

====Int2A====

|    |           |           |           |
|----|-----------|-----------|-----------|
| Mo | -0.622143 | -0.180076 | 0.751042  |
| O  | 0.567407  | -1.622518 | -0.054144 |
| O  | -0.773092 | -0.572347 | 2.407693  |
| S  | 1.184120  | 1.187044  | 0.469878  |
| S  | -2.139515 | 1.711841  | 0.374787  |
| S  | -2.369429 | -1.343321 | -0.559479 |
| C  | -3.787087 | -0.257819 | -0.593555 |
| C  | -3.692970 | 1.028251  | -0.187216 |
| C  | -4.818496 | 2.037206  | -0.194446 |
| H  | -4.530626 | 2.934448  | -0.761247 |
| H  | -5.050989 | 2.377098  | 0.825705  |
| H  | -5.743454 | 1.646419  | -0.634409 |
| C  | -5.037124 | -0.922120 | -1.123803 |
| H  | -5.882804 | -0.231120 | -1.219899 |
| H  | -5.353458 | -1.748447 | -0.470189 |
| H  | -4.851033 | -1.364346 | -2.113300 |
| Cu | 3.033878  | 0.000801  | -0.177356 |
| S  | 5.142045  | 0.812399  | -0.404072 |
| C  | 4.850033  | 2.619254  | -0.664783 |
| H  | 4.184829  | 3.025966  | 0.103343  |
| H  | 4.398226  | 2.816019  | -1.643704 |
| H  | 5.807614  | 3.155099  | -0.616127 |
| C  | 1.853701  | -1.590478 | -0.340115 |
| O  | 2.514213  | -2.528095 | -0.756122 |

====

====TS2A====

|    |           |           |           |
|----|-----------|-----------|-----------|
| Mo | 0.720917  | -0.187044 | 0.473659  |
| O  | -0.557691 | 1.519581  | 0.429959  |
| O  | 0.426113  | -0.958246 | 1.965450  |
| S  | -0.889656 | -0.762423 | -1.205089 |
| S  | 2.410177  | -1.499491 | -0.661372 |
| S  | 2.550991  | 1.397816  | 0.688718  |
| C  | 4.048483  | 0.507797  | 0.254728  |
| C  | 3.988071  | -0.718786 | -0.307315 |
| C  | 5.175841  | -1.551777 | -0.728866 |
| H  | 5.091882  | -1.837584 | -1.787558 |
| H  | 5.221362  | -2.491659 | -0.158464 |
| H  | 6.134364  | -1.035099 | -0.597036 |

|    |           |           |           |
|----|-----------|-----------|-----------|
| C  | 5.312123  | 1.271547  | 0.574049  |
| H  | 6.222060  | 0.755708  | 0.244048  |
| H  | 5.403451  | 1.449817  | 1.656023  |
| H  | 5.298135  | 2.263417  | 0.098535  |
| Cu | -2.833386 | -0.086735 | -0.399199 |
| S  | -4.956408 | -0.016837 | 0.265169  |
| C  | -5.048028 | -1.396301 | 1.494130  |
| H  | -4.350202 | -1.240240 | 2.323174  |
| H  | -4.821642 | -2.364521 | 1.033989  |
| H  | -6.065006 | -1.442701 | 1.906111  |
| C  | -1.441515 | 1.569062  | -0.492944 |
| O  | -1.890421 | 2.447268  | -1.186651 |

====Int3A====

|    |           |           |           |
|----|-----------|-----------|-----------|
| Mo | 0.903593  | -1.434632 | -0.860775 |
| O  | -0.162639 | -2.862955 | 0.342477  |
| O  | 1.740424  | -2.193474 | -2.139525 |
| S  | -1.558001 | -1.541181 | -1.366751 |
| S  | 1.145595  | 0.937537  | -1.074030 |
| S  | 2.417692  | -1.145176 | 0.982330  |
| C  | 3.055138  | 0.534277  | 0.861375  |
| C  | 2.516838  | 1.415644  | -0.006702 |
| C  | 2.942887  | 2.852886  | -0.186613 |
| H  | 2.085696  | 3.529454  | -0.057328 |
| H  | 3.322898  | 3.028079  | -1.204459 |
| H  | 3.723724  | 3.163567  | 0.518740  |
| C  | 4.192963  | 0.815337  | 1.813404  |
| H  | 4.528796  | 1.859153  | 1.784627  |
| H  | 5.062077  | 0.178396  | 1.589649  |
| H  | 3.900805  | 0.585936  | 2.848675  |
| C  | -1.419295 | -2.831857 | 0.010040  |
| O  | -2.349263 | -3.473284 | 0.453607  |
| Cu | -3.095378 | -0.079176 | -0.729708 |
| S  | -4.704406 | 1.335664  | -0.260016 |
| C  | -3.906741 | 2.522953  | 0.914442  |
| H  | -3.017186 | 2.984754  | 0.475780  |
| H  | -4.625338 | 3.316781  | 1.156943  |
| H  | -3.613660 | 2.029405  | 1.846849  |

====TS3A====

|    |           |           |           |
|----|-----------|-----------|-----------|
| Mo | -1.070042 | -0.840180 | 0.832066  |
| O  | 0.193101  | -2.105656 | -0.397050 |
| O  | -1.513550 | -1.633718 | 2.273840  |
| S  | 1.396462  | -0.236565 | 0.928750  |
| S  | -1.917137 | 1.397984  | 0.901365  |
| S  | -2.822775 | -1.163194 | -0.769307 |
| C  | -3.879156 | 0.292225  | -0.673988 |
| C  | -3.496307 | 1.375918  | 0.032063  |
| C  | -4.275818 | 2.660995  | 0.172187  |
| H  | -3.666360 | 3.520213  | -0.144018 |
| H  | -4.547564 | 2.845949  | 1.222356  |
| H  | -5.200607 | 2.672071  | -0.417893 |
| C  | -5.163289 | 0.153661  | -1.455757 |
| H  | -5.768189 | 1.068743  | -1.455300 |
| H  | -5.786232 | -0.658777 | -1.052175 |
| H  | -4.954792 | -0.109179 | -2.503262 |
| C  | 1.381417  | -1.617248 | -0.260696 |

|    |          |           |           |
|----|----------|-----------|-----------|
| O  | 2.413406 | -1.926044 | -0.875222 |
| Cu | 3.484044 | 0.049587  | -0.236469 |
| S  | 5.424981 | 0.940025  | -0.747335 |
| C  | 5.425789 | 2.570984  | 0.125285  |
| H  | 4.609488 | 3.213728  | -0.221004 |
| H  | 6.375480 | 3.085008  | -0.077017 |
| H  | 5.328443 | 2.449622  | 1.209683  |

====Int4A====

|    |           |           |           |
|----|-----------|-----------|-----------|
| Mo | -1.218136 | -0.462976 | 0.875136  |
| O  | 0.309000  | -1.621558 | -0.175385 |
| O  | -1.489574 | -1.135203 | 2.419274  |
| S  | 1.012950  | 0.662655  | 0.741938  |
| S  | -2.497866 | 1.557333  | 0.698765  |
| S  | -2.857862 | -1.302548 | -0.669850 |
| C  | -4.176208 | -0.076973 | -0.740283 |
| C  | -4.026303 | 1.130500  | -0.157463 |
| C  | -5.045494 | 2.244187  | -0.158802 |
| H  | -4.609131 | 3.168906  | -0.564321 |
| H  | -5.373043 | 2.481847  | 0.864679  |
| H  | -5.940379 | 2.010561  | -0.749044 |
| C  | -5.393383 | -0.547245 | -1.499792 |
| H  | -6.169796 | 0.222758  | -1.589351 |
| H  | -5.847617 | -1.424215 | -1.014334 |
| H  | -5.119275 | -0.866241 | -2.516345 |
| C  | 1.359966  | -0.885114 | -0.082223 |
| O  | 2.478744  | -1.238871 | -0.561237 |
| Cu | 4.157190  | -0.359767 | -0.524628 |
| S  | 6.173602  | 0.435630  | -0.598918 |
| C  | 5.996104  | 2.146893  | 0.081822  |
| H  | 5.322474  | 2.755599  | -0.529124 |
| H  | 6.984392  | 2.624287  | 0.086706  |
| H  | 5.613880  | 2.134887  | 1.107022  |

====TS4A====

|    |           |           |           |
|----|-----------|-----------|-----------|
| Mo | 1.216146  | 0.979672  | 1.819314  |
| O  | 2.131945  | 1.354102  | 3.218056  |
| S  | 2.371992  | 1.737199  | -0.117063 |
| S  | 1.978313  | -1.149502 | 1.158613  |
| C  | 3.141963  | -0.898778 | -0.205432 |
| C  | 3.298811  | 0.318695  | -0.756553 |
| C  | 4.212234  | 0.666848  | -1.904693 |
| C  | 3.842411  | -2.164768 | -0.631231 |
| S  | -1.158615 | 0.733974  | 1.985536  |
| Cu | -2.314654 | -0.292971 | 0.425385  |
| S  | -3.616772 | -1.331511 | -1.021651 |
| C  | -2.494317 | -1.663374 | -2.454723 |
| C  | -1.178580 | 3.246472  | 1.966110  |
| O  | -0.077848 | 3.444103  | 2.399159  |
| O  | -2.235374 | 3.594449  | 1.550335  |
| H  | -3.046388 | -2.227810 | -3.218396 |
| H  | -1.623342 | -2.253897 | -2.153615 |
| H  | 3.647026  | 1.138609  | -2.721955 |
| H  | 3.111121  | -2.949338 | -0.874007 |
| H  | -2.135835 | -0.733424 | -2.908701 |
| H  | 4.486874  | -2.025315 | -1.508111 |
| H  | 4.732378  | -0.206005 | -2.318456 |
| H  | 4.465897  | -2.564194 | 0.182946  |

H 4.976083 1.396458 -1.595864  
=====

=====Int5A=====

Mo 0.957694 -0.035955 1.296292  
O 1.784544 0.626842 2.649539  
S 1.837952 0.942639 -0.680881  
S 2.145732 -1.955659 0.561920  
C 3.114946 -1.480691 -0.896416  
C 2.984959 -0.250683 -1.423390  
C 3.710879 0.284143 -2.631420  
C 4.014234 -2.578598 -1.404997  
S -1.350924 -0.197065 1.513277  
Cu -2.570660 -1.028535 -0.111694  
S -3.971392 -1.861994 -1.602972  
C -3.014979 -1.797164 -3.185588  
C -1.292398 3.179590 0.591124  
O -1.023486 3.536825 1.674382  
O -1.595941 2.938956 -0.512658  
H -3.629765 -2.217241 -3.993199  
H -2.090402 -2.379478 -3.119460  
H 2.997107 0.631558 -3.392967  
H 3.434095 -3.486970 -1.625062  
H -2.752123 -0.768568 -3.453909  
H 4.558224 -2.300805 -2.316971  
H 4.366488 -0.459393 -3.102584  
H 4.758264 -2.864335 -0.645725  
H 4.329165 1.155852 -2.367733  
=====

=====Int7A=====

Mo 0.898628 0.411458 0.034145  
O 0.917927 1.048374 1.616175  
S 2.923864 1.184507 -1.100727  
S 2.340330 -1.601418 0.376184  
C 4.002082 -1.049353 0.055148  
C 4.255137 0.113677 -0.588836  
C 5.618148 0.640940 -0.973928  
C 5.055197 -2.040310 0.500812  
S -0.618371 -1.448056 -0.403660  
Cu -2.799313 -1.192102 -0.442376  
S -5.013005 -1.350689 -0.479221  
C -5.537627 0.061067 -1.558314  
C -0.828427 1.487135 -0.604345  
O 0.188525 2.004902 -1.178444  
O -2.013346 1.748438 -0.564762  
O -4.311845 1.508181 1.275803  
H -6.624171 0.012233 -1.708436  
H -5.050233 0.019764 -2.538023  
H 5.665265 0.849524 -2.052905  
H 4.841000 -3.036890 0.090466  
H -5.290698 1.010384 -1.074899  
H 6.068809 -1.760111 0.191705  
H 6.425640 -0.059718 -0.734433  
H 5.055084 -2.146917 1.594778  
H 5.838129 1.590376 -0.463897  
H -3.491087 1.606079 0.757013  
H -4.553995 0.581827 1.077881  
=====

=====Int8A=====

C 5.636155 -1.840362 1.124932  
S 5.486494 -0.338989 0.054320  
Cu 3.346133 -0.321065 -0.541802  
S 1.293119 -0.445515 -1.286039  
Mo -0.526677 0.728736 -0.114766  
O 1.115374 0.760333 1.502241  
O -0.708769 2.412677 -0.344611  
C -4.583439 -1.111713 1.713329  
C -3.483839 -0.709587 0.762261  
S -1.998140 -0.107986 1.596948  
C -3.536988 -0.747222 -0.585081  
S -2.126551 -0.276785 -1.600078  
C -4.722620 -1.214814 -1.396342  
H 6.665061 -1.913715 1.502420  
H 5.412770 -2.758589 0.569526  
H 0.983366 -0.055063 2.017962  
H -4.230547 -1.879454 2.418921  
H -4.423150 -2.014619 -2.088625  
H 4.961067 -1.789747 1.986202  
H -5.547951 -1.594512 -0.781171  
H -5.467926 -1.511720 1.202345  
H -5.117161 -0.398517 -2.019818  
H -4.910619 -0.258218 2.326935  
H 1.898955 0.543564 0.924954  
C 0.503555 -2.846615 1.339827  
O -0.015168 -3.599463 0.614340  
O 1.042320 -2.184576 2.146746  
=====

Geometries obtained by DFT calculations on  
model II with constraints

=====Int1A=====

H 0.756486 -4.415652 -1.519628  
C 1.578996 -4.830463 -2.107928  
S 3.057634 -3.724551 -2.021153  
Cu 2.161468 -1.671127 -1.705761  
S -0.122169 -1.328855 -1.806719  
Mo -0.503030 -0.013724 0.108695  
O -0.205159 -1.153965 1.393280  
O 0.748371 1.175878 0.175336  
H -3.798426 3.279055 2.457934  
C -4.347580 2.595016 1.793180  
C -3.408767 1.861643 0.868957  
S -2.255152 0.815603 1.716212  
C -3.438289 1.921517 -0.481690  
S -2.304272 0.982042 -1.472122  
C -4.430106 2.742663 -1.274593  
H -5.174943 3.248048 -0.650413  
H -5.100387 3.186414 1.261451  
H -3.917880 3.511114 -1.872216  
H 1.834714 -5.824234 -1.716930  
H 1.233727 -4.946923 -3.142544  
H -4.881697 1.892496 2.451261  
H -4.969550 2.106469 -1.991467  
C 3.126894 -0.082613 -1.605090  
O 3.653300 0.933060 -1.738427  
=====



====TS1A====

|    |            |            |            |
|----|------------|------------|------------|
| H  | 97.731050  | 138.931097 | 145.237416 |
| C  | 98.814892  | 138.777133 | 145.275196 |
| S  | 99.516349  | 139.299281 | 146.902914 |
| Cu | 98.982609  | 141.467766 | 147.160207 |
| S  | 98.124290  | 143.290845 | 145.929428 |
| Mo | 97.269075  | 144.732034 | 147.479039 |
| O  | 97.951445  | 143.865247 | 148.925751 |
| O  | 98.111018  | 146.226769 | 147.333638 |
| H  | 93.222592  | 147.036398 | 149.812275 |
| C  | 92.888338  | 146.202584 | 149.176283 |
| C  | 93.993296  | 145.732560 | 148.263038 |
| S  | 95.381944  | 145.043269 | 149.126329 |
| C  | 93.952868  | 145.778844 | 146.911775 |
| S  | 95.276878  | 145.114504 | 145.927599 |
| C  | 92.805770  | 146.350284 | 146.108519 |
| H  | 91.954200  | 146.653535 | 146.726594 |
| H  | 91.993287  | 146.534469 | 148.639129 |
| H  | 93.129117  | 147.229730 | 145.531842 |
| H  | 99.014280  | 137.708131 | 145.118139 |
| H  | 99.265057  | 139.333242 | 144.445001 |
| H  | 92.584931  | 145.397407 | 149.861620 |
| H  | 92.442521  | 145.617083 | 145.373377 |
| C  | 99.321167  | 142.575810 | 148.790023 |
| O  | 100.088310 | 142.676044 | 149.659962 |

=====

====Int2A====

|    |           |           |           |
|----|-----------|-----------|-----------|
| H  | 0.748442  | -5.217273 | -1.506129 |
| C  | 1.578992  | -4.830459 | -2.107921 |
| S  | 2.895557  | -4.083061 | -1.047665 |
| Cu | 1.861375  | -2.241215 | -0.223383 |
| S  | 0.643136  | -0.677586 | -1.356881 |
| Mo | -0.130663 | 0.954228  | 0.043892  |
| O  | 0.662274  | -0.192708 | 1.527990  |
| O  | 0.885965  | 2.323100  | -0.076551 |
| H  | -3.968246 | 3.411885  | 2.425654  |
| C  | -4.347567 | 2.594999  | 1.793168  |
| C  | -3.270698 | 2.069799  | 0.876841  |
| S  | -1.897541 | 1.321012  | 1.735427  |
| C  | -3.309336 | 2.127910  | -0.471914 |
| S  | -2.010531 | 1.414141  | -1.470320 |
| C  | -4.430117 | 2.742676  | -1.274588 |
| H  | -5.275645 | 3.068659  | -0.659306 |
| H  | -5.226519 | 2.971155  | 1.258408  |
| H  | -4.076193 | 3.615907  | -1.843377 |
| H  | 2.001419  | -5.666409 | -2.681596 |
| H  | 1.175872  | -4.096345 | -2.813196 |
| H  | -4.687653 | 1.807423  | 2.481702  |
| H  | -4.813772 | 2.027872  | -2.017394 |
| C  | 1.440910  | -1.253048 | 1.457341  |
| O  | 1.983466  | -1.801990 | 2.401305  |

=====

====TS2A====

|    |          |           |           |
|----|----------|-----------|-----------|
| H  | 0.493896 | -4.700446 | -2.187328 |
| C  | 1.579013 | -4.830484 | -2.107974 |
| S  | 2.250256 | -4.068092 | -0.560935 |
| Cu | 1.733228 | -1.903876 | -0.705313 |
| S  | 1.272254 | 0.118265  | -1.437076 |

|    |           |           |           |
|----|-----------|-----------|-----------|
| Mo | 0.023056  | 1.514787  | 0.056252  |
| O  | 1.013159  | 0.166023  | 1.364732  |
| O  | 0.871070  | 2.992692  | 0.110411  |
| H  | -4.057509 | 3.445219  | 2.429367  |
| C  | -4.347663 | 2.595120  | 1.793204  |
| C  | -3.214725 | 2.194146  | 0.879388  |
| S  | -1.753866 | 1.595471  | 1.729803  |
| C  | -3.246480 | 2.275892  | -0.466599 |
| S  | -1.831198 | 1.798145  | -1.462176 |
| C  | -4.430041 | 2.742580  | -1.274572 |
| H  | -5.326148 | 2.922107  | -0.669896 |
| H  | -5.258276 | 2.879869  | 1.254688  |
| H  | -4.201361 | 3.673867  | -1.815662 |
| H  | 1.792862  | -5.907592 | -2.096130 |
| H  | 2.040817  | -4.402557 | -3.005051 |
| H  | -4.606856 | 1.774529  | 2.478675  |
| H  | -4.691030 | 1.999784  | -2.042863 |
| C  | 2.069071  | -0.373317 | 0.870420  |
| O  | 3.188882  | -0.541695 | 1.281568  |

=====

====Int3A====

|    |           |           |           |
|----|-----------|-----------|-----------|
| H  | 2.576697  | -4.852875 | -1.860497 |
| C  | 1.513466  | -5.092621 | -1.965621 |
| S  | 0.644998  | -3.888199 | -3.072124 |
| Cu | 0.944693  | -1.973544 | -2.033612 |
| S  | 1.434105  | -0.054871 | -1.023606 |
| Mo | 0.008478  | 1.589014  | 0.239077  |
| O  | 1.074051  | 0.216803  | 1.509634  |
| O  | 0.797414  | 3.101119  | 0.226083  |
| H  | -4.228491 | 3.215866  | 2.567310  |
| C  | -4.413246 | 2.333029  | 1.935581  |
| C  | -3.244180 | 2.056027  | 1.027048  |
| S  | -1.729833 | 1.622170  | 1.894881  |
| C  | -3.282839 | 2.105582  | -0.318975 |
| S  | -1.827863 | 1.702334  | -1.300398 |
| C  | -4.495542 | 2.480385  | -1.132183 |
| H  | -5.397810 | 2.626278  | -0.527413 |
| H  | -5.351851 | 2.502516  | 1.396028  |
| H  | -4.319696 | 3.409676  | -1.695805 |
| H  | 1.429065  | -6.096421 | -2.402132 |
| H  | 1.066940  | -5.113948 | -0.966549 |
| H  | -4.574556 | 1.492254  | 2.626693  |
| H  | -4.716891 | 1.706176  | -1.881585 |
| C  | 1.772841  | -0.582075 | 0.760676  |
| O  | 2.502920  | -1.498329 | 1.082403  |

=====

====TS3A====

|    |           |           |           |
|----|-----------|-----------|-----------|
| H  | 0.558531  | -4.758116 | -1.717027 |
| C  | 1.579025  | -4.830500 | -2.107947 |
| S  | 2.818191  | -4.188981 | -0.897447 |
| Cu | 2.293403  | -2.082918 | -0.557025 |
| S  | 1.533626  | 0.219430  | -0.877291 |
| Mo | 0.108384  | 2.066674  | 0.130473  |
| O  | 1.309565  | 0.982424  | 1.586886  |
| O  | 0.822937  | 3.603511  | -0.047531 |
| H  | -4.245111 | 3.500316  | 2.412210  |
| C  | -4.347609 | 2.595051  | 1.793201  |
| C  | -3.162379 | 2.402786  | 0.888218  |

|   |           |           |           |
|---|-----------|-----------|-----------|
| S | -1.623530 | 2.118685  | 1.772342  |
| C | -3.203474 | 2.410784  | -0.458654 |
| S | -1.734951 | 2.005815  | -1.421419 |
| C | -4.430108 | 2.742664  | -1.274595 |
| H | -5.328287 | 2.894357  | -0.665687 |
| H | -5.298863 | 2.668787  | 1.253858  |
| H | -4.267944 | 3.659576  | -1.861484 |
| H | 1.791908  | -5.888992 | -2.311107 |
| H | 1.619191  | -4.287376 | -3.058884 |
| H | -4.431355 | 1.753646  | 2.497002  |
| H | -4.648080 | 1.947627  | -2.003368 |
| C | 1.939078  | 0.092047  | 0.902464  |
| O | 2.670633  | -0.820184 | 1.317247  |

=====

====Int4A====

|    |           |           |           |
|----|-----------|-----------|-----------|
| H  | 0.471983  | -5.446210 | -1.381346 |
| C  | 1.340685  | -5.316175 | -2.034476 |
| S  | 2.903707  | -5.124431 | -1.058759 |
| Cu | 2.526514  | -3.256187 | -0.025872 |
| S  | 1.065201  | -0.282367 | -1.061432 |
| Mo | -0.126634 | 1.525301  | 0.178558  |
| O  | 0.994056  | 0.153307  | 1.461432  |
| O  | 0.678743  | 3.029715  | 0.134365  |
| H  | -4.442328 | 2.981903  | 2.522988  |
| C  | -4.585954 | 2.109383  | 1.866680  |
| C  | -3.400623 | 1.905363  | 0.961108  |
| S  | -1.869052 | 1.539697  | 1.831528  |
| C  | -3.437605 | 1.960019  | -0.384629 |
| S  | -1.964959 | 1.628872  | -1.364496 |
| C  | -4.668446 | 2.256988  | -1.201126 |
| H  | -5.576747 | 2.367846  | -0.597792 |
| H  | -5.527593 | 2.254988  | 1.325101  |
| H  | -4.542220 | 3.182776  | -1.783647 |
| H  | 1.431549  | -6.207393 | -2.668787 |
| H  | 1.162292  | -4.449876 | -2.677579 |
| H  | -4.717252 | 1.244907  | 2.534883  |
| H  | -4.851055 | 1.458018  | -1.935333 |
| C  | 1.486624  | -0.691945 | 0.628348  |
| O  | 2.152758  | -1.705780 | 1.000395  |

=====

====TS4A====

|    |           |           |           |
|----|-----------|-----------|-----------|
| H  | 2.069724  | -4.602261 | -2.772696 |
| C  | 1.513470  | -5.092626 | -1.965617 |
| S  | -0.115548 | -4.270417 | -1.656614 |
| Cu | 0.451531  | -2.224680 | -1.041525 |
| S  | 1.226214  | -0.246532 | -0.479466 |
| Mo | 0.010288  | 1.689490  | 0.221227  |
| O  | 2.190731  | 1.067198  | 1.969084  |
| O  | 0.772139  | 3.221926  | 0.162600  |
| H  | -4.259448 | 3.225231  | 2.562541  |
| C  | -4.413237 | 2.333017  | 1.935579  |
| C  | -3.237582 | 2.097643  | 1.026556  |
| S  | -1.691830 | 1.722572  | 1.887126  |
| C  | -3.271930 | 2.166486  | -0.315027 |
| S  | -1.785605 | 1.856858  | -1.296415 |
| C  | -4.495555 | 2.480401  | -1.132185 |
| H  | -5.412854 | 2.539724  | -0.535531 |
| H  | -5.358012 | 2.466398  | 1.396559  |

|   |           |           |           |
|---|-----------|-----------|-----------|
| H | -4.383183 | 3.437265  | -1.665706 |
| H | 1.337241  | -6.136034 | -2.260117 |
| H | 2.142526  | -5.094525 | -1.068634 |
| H | -4.542488 | 1.490177  | 2.630923  |
| H | -4.651041 | 1.715053  | -1.906798 |
| C | 2.383823  | -0.091920 | 1.728457  |
| O | 2.821905  | -1.167901 | 1.979866  |

=====

====Int5A====

|    |           |           |           |
|----|-----------|-----------|-----------|
| H  | 1.604008  | -4.737198 | -2.842799 |
| C  | 1.789193  | -5.310649 | -1.927655 |
| S  | 0.575758  | -4.883607 | -0.596779 |
| Cu | 0.941072  | -2.730940 | -0.230232 |
| S  | 1.560430  | -0.647503 | 0.074995  |
| Mo | 0.279845  | 1.279918  | 0.268151  |
| O  | 2.649173  | 0.408099  | 3.509395  |
| O  | 1.183845  | 2.738730  | 0.337546  |
| H  | -3.938465 | 2.978682  | 2.627036  |
| C  | -4.137402 | 2.114854  | 1.973441  |
| C  | -2.970865 | 1.845608  | 1.062465  |
| S  | -1.436216 | 1.399689  | 1.914607  |
| C  | -3.005338 | 1.917897  | -0.277804 |
| S  | -1.516445 | 1.588555  | -1.254760 |
| C  | -4.219797 | 2.262335  | -1.094243 |
| H  | -5.126705 | 2.391485  | -0.492091 |
| H  | -5.071575 | 2.314712  | 1.435950  |
| H  | -4.065568 | 3.191163  | -1.665823 |
| H  | 1.693979  | -6.377793 | -2.169983 |
| H  | 2.822266  | -5.125887 | -1.611733 |
| H  | -4.315587 | 1.260715  | 2.644260  |
| H  | -4.424268 | 1.477992  | -1.838714 |
| C  | 1.822345  | -0.420930 | 3.554663  |
| O  | 1.030685  | -1.267228 | 3.714694  |

=====

====Int7A====

|    |           |           |           |
|----|-----------|-----------|-----------|
| H  | 2.403720  | -4.719606 | -2.482998 |
| C  | 1.513466  | -5.092620 | -1.965611 |
| S  | -0.031366 | -4.327708 | -2.635572 |
| Cu | 0.279970  | -2.184202 | -2.233691 |
| S  | 0.550668  | -0.023950 | -2.051822 |
| Mo | -0.110192 | 0.866268  | 0.175138  |
| O  | 0.472707  | -0.374133 | 1.787685  |
| O  | 0.784735  | 2.302632  | 0.329638  |
| H  | -4.065496 | 3.137167  | 2.601128  |
| C  | -4.413226 | 2.333003  | 1.935601  |
| C  | -3.310066 | 1.870572  | 1.016842  |
| S  | -1.924110 | 1.118637  | 1.836490  |
| C  | -3.334947 | 1.954736  | -0.329225 |
| S  | -1.998788 | 1.332449  | -1.333221 |
| C  | -4.495562 | 2.480410  | -1.132213 |
| H  | -5.368928 | 2.730974  | -0.520821 |
| H  | -5.287136 | 2.707482  | 1.393977  |
| H  | -4.215322 | 3.381485  | -1.697846 |
| H  | 1.466156  | -6.181540 | -2.103783 |
| H  | 1.630441  | -4.886899 | -0.896823 |
| H  | -4.749474 | 1.514847  | 2.589837  |
| H  | -4.812918 | 1.736801  | -1.876761 |
| C  | 1.298363  | -0.597149 | 0.833295  |

|   |          |           |           |
|---|----------|-----------|-----------|
| O | 2.294838 | -1.281325 | 0.718115  |
| O | 3.862314 | -0.562470 | -1.632645 |
| H | 3.493119 | -0.922658 | -0.803228 |
| H | 3.024218 | -0.273737 | -2.048092 |

====

====Int8A====

|    |           |           |           |
|----|-----------|-----------|-----------|
| H  | 0.728054  | -5.043185 | -1.921359 |
| C  | 1.789190  | -5.310645 | -1.927660 |
| S  | 2.699961  | -4.466087 | -0.556807 |
| Cu | 2.023179  | -2.350841 | -0.770752 |
| S  | 1.264685  | -0.398330 | -1.348031 |
| Mo | 0.271736  | 1.226583  | 0.220712  |
| O  | 4.864200  | -4.448343 | -3.046884 |
| O  | 1.154818  | 2.686655  | 0.276934  |
| H  | -3.887671 | 2.945746  | 2.651378  |
| C  | -4.137414 | 2.114869  | 1.973444  |
| C  | -2.980845 | 1.801612  | 1.058152  |
| S  | -1.469301 | 1.288608  | 1.898519  |
| C  | -3.001084 | 1.906264  | -0.285176 |
| S  | -1.556901 | 1.551739  | -1.293051 |
| C  | -4.219782 | 2.262317  | -1.094240 |
| H  | -5.129909 | 2.370442  | -0.492858 |
| H  | -5.050879 | 2.391568  | 1.435407  |
| H  | -4.071968 | 3.202559  | -1.647740 |
| H  | 1.874228  | -6.398491 | -1.805370 |
| H  | 2.214586  | -5.039126 | -2.899206 |
| H  | -4.377930 | 1.256274  | 2.619780  |
| H  | -4.411759 | 1.489687  | -1.852906 |
| C  | 5.266826  | -4.079705 | -2.004358 |
| O  | 5.901591  | -3.702239 | -1.090720 |
| O  | 1.311019  | -0.215424 | 1.629278  |
| H  | 1.708759  | -0.823878 | 0.935669  |
| H  | 0.602223  | -0.724063 | 2.060554  |

====
